# Gut bacterial nutrient preferences quantified in vivo

Xianfeng Zeng<sup>1,4</sup>, Xi Xing<sup>1,4</sup>, Meera Gupta<sup>2,3,4</sup>, Felix C Keber<sup>2,4</sup>, Jaime G Lopez<sup>4</sup>, Arael Roichman<sup>1,4</sup>, Lin Wang<sup>1,4</sup>, Michael D Neinast<sup>1,4</sup>, Mohamed S Donia<sup>2</sup>, Martin Wühr<sup>2,4†</sup>, Cholsoon Jang<sup>5†</sup>, Joshua D Rabinowitz<sup>1,2,4,6†</sup>

1. Department of Chemistry, Princeton University, Princeton, New Jersey 08544, USA

2. Department of Molecular Biology, Princeton University, Princeton, New Jersey 08544, USA

3. Department of Chemical and Biological Engineering, Princeton University, Princeton, NJ 08544, USA

4. Lewis-Sigler Institute for Integrative Genomics, Princeton University, Princeton, New Jersey 08544, USA

5. Department of Biological Chemistry, University of California Irvine, Irvine, California 92697, USA

6. Ludwig Institute for Cancer Research, Princeton Branch, Princeton University, Princeton, NJ 08544, USA

†Correspondence: [joshr@princeton.edu](mailto:joshr@princeton.edu), [choljang@uci.edu](mailto:choljang@uci.edu), [wuhr@princeton.edu](mailto:wuhr@princeton.edu)

## Abstract

Great progress has been made in understanding gut microbiome's products and their effects on health and disease. Less attention, however, has been given to the inputs that gut bacteria consume. Here we quantitatively examine inputs and outputs of the mouse gut microbiome, using isotope tracing. The main input to microbial carbohydrate fermentation is dietary fiber, and to branched-chain fatty acids and aromatic metabolites is dietary protein. In addition, circulating host lactate, 3-hydroxybutyrate and urea (but not glucose or amino acids) feed the gut microbiome. To determine nutrient preferences across bacteria, we traced into genus-specific bacterial protein sequences. We find systematic differences in nutrient use: Most genera in the phylum Firmicutes prefer dietary protein, *Bacteroides* dietary fiber, and *Akkermansia* circulating host lactate. Such preferences correlate with microbiome composition changes in response to dietary modifications. Thus, diet shapes the microbiome by promoting the growth of bacteria that preferentially use the ingested nutrients.

## 37 INTRODUCTION

38 The gut microbiome possesses an enormous diversity of enzymes, exceeding the number in  
39 mammals' genomes by more than 100-fold (Qin et al., 2010). This enzymatic capacity enables the  
40 processing of incoming dietary nutrients into a broad spectrum of microbial metabolites. Some of  
41 these reach the host circulation at substantial concentrations (Lai et al., 2021; Quinn et al., 2020).  
42 Microbial metabolites can play important roles in host pathophysiology. For example, short-chain  
43 fatty acids (SCFAs; acetate, propionate, butyrate) (Dalile et al., 2019; Koh et al., 2016),  
44 trimethylamine N-oxide (Tang et al., 2013), secondary bile acids (Arab et al., 2017; Funabashi et  
45 al., 2020), indole-3-propionate (Wikoff et al., 2009), and imidazole propionate (Koh et al., 2018)  
46 affect immune maturation (Campbell et al., 2020; Hang et al., 2019), insulin sensitivity (Koh et  
47 al., 2018), cancer growth (Garrett, 2015; Yoshimoto et al., 2013), and cardiovascular disease  
48 (Nemet et al., 2020; Wang et al., 2011).

49 Both to replicate themselves and to release metabolic products, gut bacteria require nutrient inputs.  
50 These come in forms including ingested food, host-synthesized gut mucus (Desai et al., 2016;  
51 Sicard et al., 2017), and host circulating metabolites (Scheiman et al., 2019). The availability of  
52 dietary nutrients to gut microbiota depends on the extent of host absorption: nutrients that are  
53 absorbed in the small intestine, like starch, are not available to the colonic microbiome. In contrast,  
54 nutrients that are poorly digested in the upper gastrointestinal tract, like fiber, can be key  
55 microbiome feedstocks (Lund et al., 2021; Wong and Jenkins, 2007).

56 Isotope tracing enables the measurement of the inputs to metabolites and biomass in a quantitative  
57 manner. Such studies, employing radioactive tracers, defined the basics of mammalian metabolism  
58 (Wolfe, 1984). Recent work has increasingly relied on stable isotope tracers coupled to mass  
59 spectrometry detection, which enables the measurement of labeling in specific downstream  
60 products (Fernández-García et al., 2020; McCabe and Previs, 2004). This approach has revealed  
61 fundamental features of host metabolism, such as circulating lactate being a major TCA fuel  
62 (Faubert et al., 2017; Hui et al., 2017). In addition, it has provided important insights into host-  
63 microbiome metabolic interplay. For example, it revealed that dietary fructose is processed by the  
64 microbiome into acetate, which fuels hepatic lipogenesis (Jang et al., 2018; Zhao et al., 2020).

65 In principle, stable isotope tracing coupled to mass spectrometry can also be applied to determine  
66 the metabolic inputs to specific microbes, based on measuring labeling in bacteria-specific peptide  
67 sequences (Berry et al., 2015; Holmes et al., 2017; Oberbach et al., 2017; Reese et al., 2018; Zhang  
68 et al., 2016a, 2016b). By infusing nitrogen-labeled threonine to label host mucus, investigators  
69 were able to compare the contribution of dietary versus mucus protein to the gut microbiome and  
70 observed a shift towards more mucus contribution in a low-protein diet condition (Holmes et al.,  
71 2017).

72 Here, we perform the first large-scale, quantitative assessment of the metabolic inputs to the gut  
73 microbiome and its products. We examine the contributions from dietary starch, fiber, and protein,  
74 host mucus, and most major circulating host nutrients, finding that lactate, 3-hydroxybutyrate, and  
75 urea stand out for passing from the host to the gut microbiome. Moreover, based on the  
76 measurement of bacteria-specific peptide sequences, we assess the nutrient preferences of different  
77 bacterial genera and show that these preferences align with microbiome composition changes in  
78 response to altered diet.

## 79 **RESULTS**

### 80 **Microbiome consumes less digestible dietary components**

81 A major mechanism by which the microbiome may impact host physiology is via secreted  
82 metabolic products. As the intestine and colon drain into the portal circulation, metabolites  
83 produced by the gut microbiome should be enriched in the portal relative to systemic blood. We  
84 measured, in the portal, systemic circulation and the cecal contents, the absolute concentrations of  
85 more than 50 metabolites characterized in the literature as microbiome-derived (Campbell et al.,  
86 2020; De Vadder et al., 2014; Han et al., 2021; Hang et al., 2019; Koh et al., 2018; Mager et al.,  
87 2020; Ridlon et al., 2014; Wikoff et al., 2009) (**Figure 1A, S1A, Table 1, S1-2**). Most microbiome  
88 metabolites were elevated in the portal circulation relative to systemic blood, and all but two  
89 (inosine and N-acetyl-tryptophan, which are apparently mainly host derived) were depleted by  
90 antibiotics treatment.

91 The dominant excreted products on a molar basis (0.4 – 2 mM in the portal blood) are SCFAs.  
92 Other relatively abundant microbiome products (10 - 30 uM) are aromatic amino acid fermentation  
93 products (phenol, indoxyl sulfate, and 3-phenylpropionate) and branched-chain fatty acids  
94 (valerate, isovalerate, 4-methylvalerate, isobutyrate, 2-methylbutyrate). While primary bile acids  
95 were also present in the portal circulation at up to ~ 10 uM concentration, these are produced  
96 by the host and accordingly were not included in Table 1. Secondary bile acids, which are produced  
97 from primary bile acids by the microbiome, were lower in absolute concentration, the most  
98 abundant being tauroursodeoxycholic acid (3 uM in portal vein).

99 To probe the dietary inputs to gut microbial products, we began by feeding mice, by oral gavage,  
100 starch (readily digestible glucose polymer) and inulin (slowly digestible fructose polymer, i.e.,  
101 soluble fiber) (**Figure 1B**). Following <sup>13</sup>C-starch gavage, labeled glucose, lactate, and alanine  
102 quickly appeared in the portal circulation (**Figure 1C, S1B**). In contrast, after <sup>13</sup>C-inulin gavage,  
103 substantial labeled fructose, glucose, lactate, and alanine were not observed, and instead labeled  
104 portal metabolites slowly appeared in the form of SCFAs (**Figure 1C, S1C**). Quantitative analysis  
105 based on the portal-systemic differences in serum metabolite labeling (Jang et al., 2018) revealed  
106 that most starch carbons (~75%) become circulating glucose, lactate, and alanine, with no

107 discernible labeling of SCFAs. In contrast, ~ 40% of inulin carbons become SCFAs (**Figure S1C**),  
108 with the remainder being undigested and excreted in the feces (**Figure S1D**). Measurement of  
109 cecal content revealed that dietary inulin, but not starch, extensively labeled glycolytic and TCA  
110 intermediates and amino acids in the cecal content (**Figure 1D**).

111 We next carried out similar experiments, comparing the gavage of a free amino acid mixture to  
112 algal protein, both uniformly  $^{13}\text{C}$ -labeled (**Figure 1B**). The free amino acid feeding resulted in the  
113 rapid appearance of labeled amino acids in portal circulation, while the algal protein did not  
114 (**Figure 1E**). Instead, the algal protein, but not free amino acids, substantially labeled amino acids  
115 within the cecal contents (**Figure 1F**). Moreover, the algal protein copiously labeled microbiome-  
116 derived portal vein metabolites: SCFAs, branched-chain fatty acids, and aromatics (indole, indole-  
117 3-propionate, 3-phenylpropionate) (**Figure S1E-F**). Thus, poorly digestible carbohydrates and  
118 protein feed the microbiome directly, and the host indirectly via microbiome-derived products.

### 119 **Few circulating metabolites reach the microbiome**

120 Next, we examined the possibility that nutrients in host circulation feed the gut microbiota. We  
121 infused deuterated water and eighteen major circulating nutrients ( $^{13}\text{C}$ -labeled) into the systemic  
122 circulation of pre-catheterized mice (**Figure 2A**). The infusion rates were selected to achieve  
123 modest but readily measurable labeling without substantially perturbing circulating concentrations.  
124 Circulating labeling reached a steady-state by 2.5 h, at which time we collected serum and feces  
125 to quantitate the carbon contributions of each circulating nutrient to the corresponding fecal  
126 metabolites. Upon intravenous infusion of  $^{13}\text{C}$ -lactate, fecal lactate labeled rapidly (**Figure 2B**).  
127 Most infused circulating nutrients, however, did not penetrate the feces (**Figure 2C-D**). Indeed,  
128 while water fully exchanged with the feces, among abundant circulating carbon carriers, only  
129 lactate and 3-hydroxybutyrate penetrated. Glucose, amino acids, TCA intermediates and fatty  
130 acids did not. Both lactate and 3-hydroxybutyrate are substrates of monocarboxylate transporters  
131 (MCTs), which are highly expressed in the colonic epithelium (Halestrap and Price, 1999, p. 1).  
132 Thus, in contrast to most host circulating metabolites, which do not reach the colonic microbiome,  
133 monocarboxylic transporters render circulating lactate and 3-hydroxybutyrate accessible to gut  
134 microbes.

### 135 **Circulating urea is a microbiome nitrogen source**

136 In addition to carbon, nitrogen is a fundamental constituent of all living cells. To assess nitrogen  
137 sources of the gut microbiome, we infused twelve abundant circulating nutrients in  $^{15}\text{N}$ -labeled  
138 form. Nitrogen from circulating urea and ammonia, but not amino acids, penetrates the feces and  
139 contributes to microbiome amino acids (**Figure 2E, S2A-B**).

140 The liver converts ammonia into urea. Accordingly, we were curious if ammonia contributes to  
141 the microbiome directly, or only indirectly after being converted by the host into circulating urea  
142 (Bartman et al., 2021). Ammonia's contribution is quantitatively explained by the product of its  
143 contribution to circulating urea and urea's microbiome contribution (**Figure S2C-D**). Thus, urea  
144 is the main circulating host metabolite that provides nitrogen to the gut microbiome.

### 145 **Microbiota synthesize amino acids from fiber and urea**

146 To determine the physiological sources of microbiome metabolites, we measured their labeling  
147 after *ad libitum* feeding of isotopically enriched food. To this end, we fed mice standard chow with  
148 a portion of the fiber, fat, or protein  $^{13}\text{C}$ -labeled. To account for circulating nutrient inputs, we also  
149 infused  $^{13}\text{C}$ -lactate or 3-hydroxybutyrate (**Figure 3A, S3A**). These studies identified a majority of  
150 the carbon feeding into most microbiome central metabolites, with glycolytic and pentose  
151 phosphate metabolites labeling almost exclusively coming from dietary fiber (inulin), while  
152 pyruvate and TCA metabolites are also labeled from dietary algal protein and circulating lactate  
153 (**Figure 3B**).

154 We next examined inputs to microbiome amino acids, tracing also with  $^{15}\text{N}$ -labeled dietary protein  
155 and infused urea. Unlike mammals, most gut bacteria have the biosynthetic capacity to make all  
156 20 proteogenic amino acids. Nevertheless, we observed that “essential amino acids,” which cannot  
157 be made by mammals and require the expression of extensive biosynthetic pathways in bacteria,  
158 are derived mainly from dietary proteins. In contrast, “non-essential amino acids” are primarily  
159 synthesized within the gut microbiome, using dietary inulin and circulating lactate as carbon  
160 sources (**Figure 3C**). Dietary protein was the main nitrogen source for both essential and non-  
161 essential amino acids, with host urea also contributing substantially to the non-essential amino  
162 acids (**Figure 3D**). Importantly, the amino acids synthesized by the microbiome, stay in the  
163 microbiome: We do not observe discernible labeling of these amino acids in the host (**Figure S3B**).  
164 Consistent with the gut microbiome synthesizing amino acids from fiber carbon and urea nitrogen,  
165 across amino acids, urea's nitrogen contribution correlated with inulin's carbon contribution  
166 (**Figure 3E**). Thus, the microbiome obtains amino acids from a blend of dietary protein catabolism  
167 and *de novo* synthesis fed by dietary fiber and urea.

### 168 **Diverse microbiome products come from dietary protein**

169 We next examined, using isotope tracing, the carbon inputs to the microbiome products, especially  
170 the ones excreted into the portal circulation (**Table 1**). SCFAs, the most abundant microbial  
171 metabolites, come mainly from dietary fiber with minor contributions from dietary protein and  
172 host circulating lactate. Many less abundant ones, however, are almost exclusively derived from  
173 dietary protein (**Table 1**).

174 In addition to classical microbiome products, we also observed metabolites that are made in a  
175 collaborative manner, with the host carrying out the final synthesis using microbiome-derived  
176 inputs. For example, a wide range of microbiome-derived carboxylic acids are conjugated to  
177 glycine in the liver and the kidneys to make different acyl-glycines (**Figure S4A-D**) (Wikoff et al.,  
178 2009).

179 We also examined the host clearance mechanisms of microbiome metabolites, based on arterial-  
180 venous gradients across the liver and kidney and levels in the urine. SCFAs and branched-chain  
181 fatty acids were avidly consumed by the liver, consistent with their much greater abundance in the  
182 portal than systemic circulation. Most microbiome-derived metabolites were excreted by the  
183 kidney into the urine, with the notable exception of SCFAs, which are actively reabsorbed (**Table**  
184 **S1**). Thus, we establish dietary protein as a major precursor to many microbiome metabolites and  
185 identify host-microbiome interplay in the metabolism of SCFAs, including their renal reabsorption  
186 and use by liver and kidney for the synthesis of acyl-glycines.

### 187 **Gut bacterial growth is synchronized with host feeding**

188 Thus far, we have reported inputs and outputs of the gut microbiome as a whole. We now shift to  
189 examining the growth and metabolism of specific bacterial genera. To this end, we deployed  
190 proteomics to measure gut microbial peptides and their labeling, focusing on peptide sequences  
191 specific to a single bacterial genus (**Figure 4A**).

192 To quantify protein synthesis in different gut microbial genera, we used D<sub>2</sub>O tracing (Holmes et  
193 al., 2015; O'Brien et al., 2020). To achieve steady-state labeling of body water, we gave mice D<sub>2</sub>O  
194 by bolus injection followed by mixing it into drinking water. Peptide labeling in the cecal contents  
195 was then measured by proteomics (**Figure 4B**).

196 A key technical challenge in using proteomics to read out metabolic activity is the complexity,  
197 arising from natural isotope abundances, of peptide mass spectra. We used liquid chromatography-  
198 high resolution mass spectrometry to obtain the full scan (MS1) mass isotope distribution for each  
199 peptide of interest, with MS/MS analysis of the unlabeled form used to determine the peptide's  
200 identity. We then calculated, based on the mass isotope distribution, the fraction of peptide that  
201 was newly synthesized ( $\theta$ ). To this end, first, we calculated the mass isotope distribution of  
202 unlabeled peptides based on natural isotope abundances ("old"). Second, we calculated the  
203 expected mass isotope distribution of a newly-synthesized peptide generated from cecal free amino  
204 acids, whose labeling we experimentally measured by metabolomics. Then, we determined the  
205 fraction of newly synthesized ( $\theta$ ) by linear interpolation between the "old" and "newly synthesized"  
206 spectra (**Figure 4C**).

207 For each bacterial genus, we measured the newly synthesized fraction ( $\theta$ ) for a minimum of 5  
208 peptides, with abundant gut bacteria yielding  $\theta$  for over 100 characteristic peptides. Irrespective  
209 of their intracellular location, different peptides from the same bacterial genus tended to label at a  
210 similar rate, suggesting that the peptide labeling rate largely reflects bacterial growth rate (**Figure**  
211 **4D, S5A**). Labeling rate varied across bacterial genera, with a half doubling time ranging from 2.5  
212 h for *Akkermansia* to 8 h for *Lactobacillus*, which still markedly exceeded the labeling rate of host  
213 intestinal proteins (> 24 h half doubling time) (**Figure 4E-F, Figure S5B**).

214 Our prior analyses revealed that the microbiome is fed substantially by dietary components.  
215 Accordingly, we hypothesized that microbial growth synchronizes with physiological feeding,  
216 which in mice occurs mainly during the nighttime. To assess the diurnal rhythm of gut bacterial  
217 protein synthesis, mice were given D<sub>2</sub>O for 6 h intervals throughout the diurnal cycle, followed by  
218 proteomic analysis of their cecal contents. Every measured bacterial genus showed greater protein  
219 synthesis during nighttime than daytime (**Figure 4G**). Thus, gut bacteria synthesize protein in sync  
220 with the physiological feeding patterns of the host.

#### 221 **Preferred carbon sources differ across gut bacteria**

222 Next, we quantitated the carbon feedstocks of different microbes, by combining <sup>13</sup>C-nutrient  
223 labeling and proteomics. Each <sup>13</sup>C-labeled nutrient (dietary inulin, dietary algal protein, or  
224 circulating lactate) was provided for 24 hours, which is sufficient to achieve steady-state labeling  
225 in the gut bacteria. Our analysis strategy involved two steps: first, we calculated, based on each  
226 genus-specific peptide's observed mass isotope distribution, its relative <sup>13</sup>C-enrichment ( $\gamma$ )  
227 compared to that of cecal free amino acids (**Figure 5A**). Mathematically, this calculation is  
228 identical to the calculation of  $\theta$  in the D<sub>2</sub>O case, except here, the tracer is a particular <sup>13</sup>C-labeled  
229 nutrient, which unlike D<sub>2</sub>O is used preferentially by certain bacterial genera. The observed  
230 peptide's relative <sup>13</sup>C-enrichment multiplied by the average contribution of that <sup>13</sup>C-tracer to the  
231 gut microbial amino acids pool ( $L_{AA\_avg \leftarrow nutrient}$ ) gives a quantitative measure of the tracer's  
232 contribution to the observed genus-specific peptide. Averaging across such peptides gives a  
233 fractional contribution of the <sup>13</sup>C-labeled nutrient to protein synthesis in a bacterial genus.

234 Using this method, we measured feedstocks of the bacterial genera that were detected in every  
235 proteomics experiment. We observed marked differences in nutrient preferences across members  
236 of the microbiota. For example, *Bacteroides* and *Clostridium* use over four-fold more inulin than  
237 *Akkermansia*, *Muribaculum*, or *Alistipes* (**Figure 5B**). Overall, bacteria from the phylum  
238 Firmicutes, used more dietary protein than did Bacteroidetes (Firmicutes  $0.237 \pm 0.052$ ;  
239 Bacteroidetes  $0.175 \pm 0.031$ ,  $p = 0.02$ ).

240 *Akkermansia*, which is generally considered a health-promoting gut microbe, used among the least  
241 dietary inulin and protein (**Figure 5B-C**). In contrast, it used by far the most circulating lactate  
242 from the host (**Figure 5D**).

243 We were curious whether these bacterial nutrient preferences predict microbiome composition  
244 changes upon dietary changes. To explore this possibility, we fed mice an inulin-enriched or algal  
245 protein-enriched diet for two days and measured microbiome composition by 16S rRNA  
246 sequencing. Major bacteria genera with a relative abundance > 0.5% in 16S rRNA sequencing  
247 were examined. *Bacteroides*, the top consumer of <sup>13</sup>C-inulin, increased by 4-fold after high inulin  
248 diet (**Figure 5E-G**). *Clostridium*, another high inulin consumer, also increased by 2-fold. Other  
249 genera that use less inulin carbon were either unchanged or slightly decreased. Similar consistency  
250 between microbes' nutrient preference and relative abundance changes was observed in mice fed  
251 the algal protein-enriched diet (**Figure 5H-J**). Carbon-source preference measured by proteomics  
252 ( $f_{genus \leftarrow nutrient}$ ) correlates with abundance change following a diet shift measured by 16S  
253 sequencing, for both the inulin and algal protein conditions (**Figure 5G, J**). Thus, the nutrient  
254 preferences of different gut bacteria help explain microbiome compositional changes following  
255 dietary manipulations (David et al., 2014).

#### 256 **Firmicutes consume dietary protein while Bacteroidetes consume secreted host protein**

257 Lastly, we turned to the nitrogen source preferences of different gut bacteria, comparing <sup>15</sup>N-  
258 labeled dietary protein feeding to <sup>15</sup>N-urea infusion. The analytical approach was identical to that  
259 employed above for carbon source preferences. Bacterial genera that highly use carbon from  
260 dietary protein also highly use nitrogen from dietary protein, consistent with amino acids from  
261 dietary protein being assimilated intact in bacterial proteomes (**Figure 6A, S6A**).

262 Conversely, among members of the phylum Firmicutes, genera preferring urea nitrogen tended to  
263 be avid inulin users, i.e. to synthesize their own amino acids using inulin and urea (**Figure 6B,**  
264 **S6B**). Finally, again among Firmicutes, we also saw the expected trade-off where some genera  
265 prefer nitrogen from dietary protein, and others from circulating urea (**Figure S6C**). The most  
266 intriguing observation, however, was that bacteria from the phylum Firmicutes used more nitrogen  
267 both from dietary proteins and from circulating urea than did Bacteroidetes (Dietary proteins:  
268 Firmicutes  $0.263 \pm 0.044$ ; Bacteroidetes  $0.135 \pm 0.006$ ,  $p = 7.7 \times 10^{-5}$ ; Urea: Firmicutes  
269  $0.076 \pm 0.019$ ; Bacteroidetes  $0.033 \pm 0.012$ ,  $p = 0.0001$ ) (**Figure 6A-B**).

270 The low use of both dietary protein and circulating urea nitrogen by Bacteroidetes raised a key  
271 question: How do Bacteroidetes get nitrogen? It has been shown that some members of gut  
272 microbiome (e.g. *Bacteroides* and *Akkermansia*) are capable of digesting host secreted proteins  
273 such as mucins (Berry et al., 2013; Reese et al., 2018). We hypothesized that host secreted proteins



274 are a key source of Bacteroidetes nitrogen. To probe this possibility, we performed long-term (36  
275 h) <sup>15</sup>N-labeled lysine and arginine infusions to label host proteins in the colon (**Figure 6C and**  
276 **Figure S7A-D**). Lysine and arginine do not directly feed the microbiome (**Figure 1E**) but did  
277 make a discernible contribution after the long-term infusion, consistent with the labeling occurring  
278 via host proteins. Such labeling occurred preferentially in Bacteroidetes peptides (**Figure 6D**).  
279 *Akkermansia*, consistent with its mucin degrading capability, is another user of host secreted  
280 proteins. The nitrogen contributions from dietary and secreted host proteins were anti-correlated,  
281 consistent with some gut bacteria preferentially consuming dietary protein, and others host protein  
282 (**Figure 6E**). Interestingly, bacterial genera with a higher preference for dietary protein, which is  
283 dependent on host feeding, tend to grow more differently between daytime and nighttime, while  
284 genera that prefer host secreted proteins, grow at a similar rate throughout a day. (**Figure S6D-E**).  
285 Thus, dietary proteins and circulating urea are the major nitrogen feedstock of Firmicutes, while  
286 secreted host proteins provide nitrogen to Bacteroidetes.

## 287 Discussion

288 As for most microbial communities, the composition of the gut microbiome is shaped by nutrient  
289 availability. Here we developed quantitative isotope tracing approaches to measure the nutrient  
290 preferences of gut bacteria. In addition to dietary fiber and secreted host proteins, we establish  
291 dietary protein and circulating host lactate, 3-hydroxybutyrate, and urea as important nutrients  
292 feeding gut bacteria. Importantly, we rule out direct contributions from other circulating host  
293 nutrients, like glucose and amino acids, to the colonic microbiome.

294 A key technical achievement is enabling tracing from different carbon and nitrogen sources into  
295 bacteria-specific peptides, thereby revealing the nutrient preferences of different bacteria within  
296 the complex and competitive gut lumen environment. We find that Firmicutes and Bacteroidetes  
297 differ systematically in their utilization of host secreted protein versus dietary protein: Firmicutes  
298 tend to acquire amino acids from dietary protein, while Bacteroidetes rely more on secreted host  
299 protein (**Figure 6F**). This may relate to different localization of bacteria within the colon, either in  
300 terms of central versus peripheral (closer to host mucus) or distal versus proximal (closer to  
301 incoming food remnants) (Albenberg et al., 2014; Li et al., 2015; Yasuda et al., 2015).

302 Within these two major families of gut bacteria, we found marked disparities in the use of dietary  
303 fiber as a carbon source. The most abundant Bacteroidetes' genus is *Bacteroides*, and it was the  
304 most avid assimilator of fiber (inulin). In contrast, other types of bacteria in the same phylum  
305 hardly consumed inulin. Likewise, some Firmicutes like *Clostridium* avidly used fiber, while  
306 others did not. Strikingly, feeding a fiber-enriched diet led to an increased abundance of  
307 *Bacteroides* and *Clostridium*, the precise genera that most actively assimilate fiber based on  
308 isotope tracing.

309 A similar trend was observed in the case of dietary supplementation with algal protein: Firmicutes,  
310 which actively use such protein, tended to increase in abundance. Algal protein (the only type  
311 commercially available in bulk in  $^{13}\text{C}$ -labeled form) may be particularly hard for mammals to  
312 digest. This is reflected in the limited appearance of  $^{13}\text{C}$ -labeled amino acids from algal protein in  
313 the portal circulation, and instead extensive passage from the intestine into the colon. This influx  
314 of dietary protein to the microbiome was a major contributor to secreted microbiome metabolites:  
315 dietary algal protein provided a portion of the carbon in the most abundant microbiome products  
316 (e.g., SCFAs) and was the main source of most other microbiome-derived metabolites. An  
317 important future question is whether the nature of dietary protein (e.g. plant or animal-based)  
318 impacts passage through the small intestine to the colonic microbiome and thereby shapes  
319 microbiome composition or metabolite secretion (Madsen et al., 2017; Wali et al., 2021).

320 Host circulating metabolite levels may also impact microbiome nutrient access and ultimately  
321 composition. Here we show such effects are likely limited to the few host metabolites that  
322 meaningfully penetrate the microbiome: urea, 3-hydroxybutyrate, and lactate. Among them,  
323 lactate was recently shown to feed the gut microbiome in human marathon runners (Scheiman et  
324 al., 2019). Among gut bacteria, *Akkermansia* most avidly use circulating lactate. *Akkermansia* are  
325 mucin degraders, and their proximity to the gut epithelial wall may augment their access to lactate  
326 from the host circulation. *Akkermansia* are more abundant in athletes, and exercise increases their  
327 levels in mice and human (Liu et al., 2017; Munukka et al., 2018). A possible mechanism involves  
328 increased circulating lactate levels following exercise directly feeding *Akkermansia*. Whether  
329 lactate-induced *Akkermansia* growth in part mediates beneficial effects of exercise is an important  
330 open question.

331 Ultimately, manipulating the microbiome requires understanding which nutrients different bacteria  
332 consume, and how such consumption impacts microbiome composition and product secretion.  
333 Through isotope tracing, including proteomic measurements that offer bacterial genus specificity,  
334 we provide foundational knowledge about which nutrients feed the gut microbiome, and which  
335 bacteria prefer which nutrients. Currently, our measurements are limited to young mice, fed typical  
336 chow with or without fiber or algal protein supplementation. Furthermore, they are limited to the  
337 genus level and to genera that we detect by proteomics and/or sequencing. Nevertheless, we cover  
338 many important gut microbiome genera. Moreover, the methodologies developed here are poised  
339 for broader application, to eventually contribute to the holistic and quantitative understanding of  
340 the diet-microbiome-health connection.

## 341 **Methods**

342 **Mouse gavage and labeled nutrient feeding.** Mouse studies followed protocols approved by the  
343 Princeton University Animal Care and Use Committee. Unless otherwise indicated, mice were

344 group-housed on a normal light-dark cycle (8:00-20:00) with free access to water and chow. For  
345 the  $^{13}\text{C}$ -nutrient gavage experiments, 7-9-week-old male C57BL/6NCrI mice (strain 027; Charles  
346 River Laboratories) were fasted at 9 am and received a 1:2:4 mixture of inulin, protein/amino acids,  
347 and starch ( $0.5 \text{ g kg}^{-1}$  inulin,  $1 \text{ g kg}^{-1}$  protein/amino acids  $2 \text{ g kg}^{-1}$  starch dissolved in water) at 3  
348 pm via oral gavage with a plastic feeding tube (Instech Laboratories). Food was given back at 8  
349 pm.

350 For the experiments involving labeled nutrient feeding, the labeled diet was prepared by adding  
351  $^{13}\text{C}/^{15}\text{N}$ -nutrients to a diet mixture premix (modified from normal diet with reduced protein, inulin,  
352 and starch content, Research diets Inc, D20030303). The final enrichment for each labeled dietary  
353 nutrient was 10% - 25% (with observed labeling corrected by dividing by the fraction dietary  
354 nutrient labeled). The contribution of each dietary nutrient to metabolites is calculated by the  
355 metabolite labeling enrichment normalized to the final enrichment of each labeled dietary nutrient.  
356 All diets shared the same final macronutrient composition (40% starch, 20% protein or amino acids,  
357 7.5% inulin and 2.5% cellulose). Male C57BL/6NCrI mice (7-9-week-old, strain 027, Charles  
358 River Laboratories) were first adapted to a non-labeled diet (of identical composition to the  
359 subsequent labeled diet) for 10 days, and then fed labeled diet for 24 h prior to sacrifice.

360 For the deuterium water drinking experiment, mice were administered a bolus intraperitoneal  
361 injected of  $\text{D}_2\text{O}$  (1.26 % w/w relative to body weight), followed by having ad lib access to 3%  
362  $\text{D}_2\text{O}$  drinking water.

363 **Intravenous infusions.** To quantify contribution of circulating nutrients to microbiota metabolism,  
364 9-11-week-old C57BL/6 mice were catheterized in house in the right jugular vein. The mice were  
365 infused with carbon or nitrogen-labeled tracer starting at 3:30 pm without any fasting. Infusion  
366 rate was  $0.1 \text{ ul/min/g}$ . Infusion solutions are described in **Table S3**. Overnight (24 h) infusions  
367 both started and finished around 9 am. The contribution of circulating nutrient to each metabolite  
368 is calculated by the metabolite labeling enrichment normalized to the average tracer serum  
369 enrichment throughout 24 hr.

370 **Antibiotics treatment.** To deplete the mouse resident microbiome, an antibiotic drinking water  
371 protocol was used. In brief, mice were treated with a cocktail of antibiotics (1 g/L ampicillin, 1  
372 g/L neomycin, 1 g/L metronidazole, and 1 g/L vancomycin) in both their drinking water 14 days.  
373 To make the drinking water more palatable, 5% aspartame was added. The effectiveness of  
374 antibiotics treatments were verified by observing much lower SCFAs in the feces by LC-MS.

375 **Sample collection.** Systemic blood samples ( $\sim 6 \mu\text{l}$ ) were collected by tail bleeding. For sampling  
376 from tissue-specific draining veins, a mouse was put under anesthesia and different tissue veins  
377 were exposed, and blood samples were pulled with an insulin syringe (BD insulin syringes, #  
378 SY8290328291) insertion into the vein. Successful isolation of portal vein was confirmed by much

379 higher (> 10x) concentrations of SCFAs and secondary bile acids (deoxycholic acid and lithocholic  
380 acid) than systemic vein; hepatic vein was confirmed by much lower secondary bile acids, SCFAs  
381 and higher glucose, 3-hydroxybutyrate levels compared to portal vein. Mouse urine was collected  
382 from the urinary bladder using a syringe. All serum samples were placed on ice without  
383 anticoagulant for 15 min, and centrifuged at 16,000 x g for 15 min at 4 C.

384 Tissues were harvested by quick dissection and snap freezing (<5 sec) in liquid nitrogen with a  
385 pre-cooled Wollenberger clamp; intestinal contents were removed before clamping. For cecal  
386 content sampling, the mouse cecum was first removed and cut on the surface, then the cecal content  
387 was squeezed out using a tweezer followed by freeze clamping. Whole liver, intestine, and  
388 intestinal contents were collected and grounded to homogenous powder. To sample fresh feces,  
389 the mouse belly was gently massaged to induce defecation and fresh feces were freeze clamped.  
390 For long-term feces collection, a mouse was transferred to a new cage and mouse fecal pellets on  
391 the bedding were collected every 1~2 h and freeze clamped. Serum, tissue, and feces samples were  
392 kept at -80 °C until further analysis.

393 **16S rRNA gene amplicon sequencing and analysis.** Extraction of Bacterial DNA from cecal or  
394 fecal samples was performed using the Power Soil DNA Isolation kit (QIAGEN). A section of the  
395 16S rRNA gene (~250 bp, V4 region) was amplified, and Illumina sequencing libraries were  
396 prepared from these amplicons according to a previously published protocol and primers  
397 (Caporaso et al., 2012). Libraries were further pooled together at equal molar ratios and sequenced  
398 on an Illumina HiSeq 2500 Rapid Flowcell or MiSeq as paired-end reads. These reads were 2x150  
399 bp with an average depth of ~20,000 reads. Also included were 8 bp index reads, following the  
400 manufacturer's protocol (Illumina, USA). Pass-Filter reads were generated from raw sequencing  
401 reads using Illumina HiSeq Control Software. Samples were de-multiplexed using the index reads.  
402 The DADA2 plugin within QIIME2 version 2018.6 was used to infer Amplicon sequencing  
403 variants (ASVs) from the unmerged paired-end sequences (Bolyen et al., 2019; Callahan et al.,  
404 2016). The forward reads were trimmed at 150 bp and the reverse reads trimmed at 140 bp, with  
405 all other DADA2 as default. Taxonomy was assigned to the resulting ASVs with a naïve Bayes  
406 classifier trained on the Greengenes database version 13.8, with only the target region of the 16S  
407 rRNA gene used to train the classifier (Bokulich et al., 2018; McDonald et al., 2012). Downstream  
408 analyses were performed MATLAB (Hunter, 2007; McKinney, 2010).

409 **Metabolite extraction.** For serum samples, 3 ul serum was added to 90 ul methanol and incubated  
410 on ice for 10 min, followed by centrifugation at 17,000 × g for 10 min at 4°C. The supernatant was  
411 transferred to an MS vial until further analysis. For tissues and feces samples, frozen samples were  
412 first ground at liquid nitrogen temperature with a cryomill (Restch, Newtown, PA). The resulting  
413 tissue powder was extracted with 40:40:20 methanol: acetonitrile: water (40 ul extraction solvent

414 per 1 mg tissue) for 10 min on ice, followed by centrifugation at 17,000 x g for 10 min, the  
415 supernatant was transferred to a MS vial until further analysis.

416 **Measurements of metabolites, protein, and polysaccharides.** To measure metabolites in serum,  
417 tissue and feces samples, a quadrupole orbitrap mass spectrometer (Q Exactive; Thermo Fisher  
418 Scientific) was coupled to a Vanquish UHPLC system (Thermo Fisher Scientific) with  
419 electrospray ionization and scan range m/z from 60 to 1000 at 1 Hz, with a 140,000 resolution. LC  
420 separation was performed on an XBridge BEH Amide column (2.1×150 mm, 2.5 µm particle size,  
421 130 Å pore size; Waters Corporation) using a gradient of solvent A (95:5 water: acetonitrile with  
422 20 mM of ammonium acetate and 20 mM of ammonium hydroxide, pH 9.45) and solvent B  
423 (acetonitrile). Flow rate was 150 µl/min. The LC gradient was: 0 min, 85% B; 2 min, 85% B; 3  
424 min, 80% B; 5 min, 80% B; 6 min, 75% B; 7 min, 75% B; 8 min, 70% B; 9 min, 70% B; 10 min,  
425 50% B; 12 min, 50% B; 13 min, 25% B; 16 min, 25% B; 18 min, 0% B; 23 min, 0% B; 24 min,  
426 85% B; and 30 min, 85% B. Injection volume was 5-10 µl and autosampler temperature was set at  
427 4°C. For cysteine measurement, samples were derivatized before measurement as follows: Serum,  
428 cecal content or feces samples were extracted and centrifuged. To the supernatant, 2 mM N-  
429 ethylmaleimide was added and incubated at room temperature for 20 min. The resulting mixture  
430 was transferred to a MS vial. Derivatized cysteine has a m/z at 245.06015 in negative mode.

431 To quantify the metabolite concentration in serum and tissue samples, either isotope spike-in or  
432 standard spike-in was performed. For isotope spike-in, known concentrations of isotope-labeled  
433 standard were added to the serum or tissues extraction solution, then the concentration was  
434 calculated by the ratio of labeled and unlabeled metabolites. When isotope standard is not available,  
435 a serially diluted non-labeled standard was added, and a linear fitting between measured total ion  
436 count and added concentration of standard was generated. Then, the concentration of endogenous  
437 metabolite was determined by the x intercept of the fitting line.

438 Starch and inulin were measured by acid hydrolysis and LC-MS. In brief, 5-10 mg sample was  
439 mixed with 10 µl 2 M hydrochloric acid, and samples were incubated at 80°C for 2 h. After cooling  
440 down, the resulting mixture was neutralized with 12 µl saturated sodium bicarbonate, followed  
441 with 88 µl 1:1 acetonitrile: methanol solution. After centrifugation at 17,000 × g for 10 min at 4°C,  
442 the supernatant was transferred to a MS vial. Inulin and starch concentration in samples was  
443 inferred from total ion count of fructose and glucose, respectively.

444 SCFAs and BCFAs were derivatized and measured by LC-MS. Serum (5 µl) or tissue samples  
445 (~10 mg) were added to 100 µl derivatizing reagents containing 12 mM 1-Ethyl-3-(3-  
446 dimethylaminopropyl) carbodiimide, 15 mM 3-Nitrophenylhydrazine hydrochloride acid and  
447 pyridine (2% v/v) in methanol. The reaction was incubated at 4°C for 1 h. Then, the reaction  
448 mixture was centrifuged at 17,000 g for 10 min. 20 µl supernatant was quenched with 200 µl 0.5

449 mM beta-mercaptoethanol in 0.1% formic acid water. After centrifugation at 17,000 g for 10 min,  
450 the supernatant was transferred to MS vials until further analysis. The measurement of SCFAs and  
451 BCFAs are performed using the same Q Exactive PLUS hybrid quadrupole-orbitrap mass  
452 spectrometer with different column and LC setup. LC separation was on Acquity UPLC BEH C18  
453 column (2.1 mm x 100 mm, 1.7 5 µm particle size, 130 Å pore size, Waters, Milford, MA) using  
454 a gradient of solvent A (water) and solvent B (methanol). Flow rate was 200 µL/min. The LC  
455 gradient was : 0 min, 10% B; 1 min, 10% B; 5 min, 30% B; 11 min 100% B; 14 min, 100% B;  
456 14.5 min 10% B; 22 min 10 % B. Autosampler temperature was 5 °C, column temperature was  
457 60 °C and injection volume was 10 µl. Ion masses for derivatized acetate, propionate, butyrate,  
458 iso-butyrate, valeric acid, isovaleric acid, 2-methylbutyrate, 4-methylvaleric acid were 194.0571,  
459 208.0728, 222.0884, 222.0884, 236.1041, 236.1041, 236.1041, 250.1197 in negative mode,  
460 respectively.

461 **Proteomics sample preparation.** Proteomics samples were prepared mostly as previously  
462 described (Gupta et al., 2018; Wühr et al., 2014). Mouse cecal samples (10 mg each) were  
463 dissolved in 400 µl lysis buffer (6M guanidium chloride, 2% cetrimonium bromide, 5 mM  
464 dithiothreitol, 50 mM (4-(2-hydroxyethyl)-1-piperazineethanesulfonic acid) (HEPES), pH 7.2).  
465 Then the sample mixture was put on ice and sonicated for 10 cycles (30 s on and 30 s off cycle,  
466 amplitude 50%) by a sonicator (Qsonica), followed by centrifugation at 20,000 × g for 20 min at  
467 4 °C. The supernatant was taken and alkylated with 20 mM N-ethylmaleimide for 20 min at room  
468 temperature, 5 mM dithiothreitol was added to quench the excessive alkylating reagents. Proteins  
469 were purified by methanol-chloroform precipitation. The dried protein pellet was resuspended in  
470 10 mM EPPS (N-(2-Hydroxyethyl) piperazine-N'-(3-propanesulfonic acid)) at pH 8.5 with 6 M  
471 guanidine hydrochloride. Samples were heated at 60°C for 15 min and protein concentration was  
472 determined by BCA assay (Pierce BCA Protein Assay Kit, Thermo Scientific). The protein mixture  
473 (30~50 µg) was diluted with 10 mM EPPS pH 8.5 to 2 M GuaCl and digested with 10 ng/µL LysC  
474 (Wako) at room temperature overnight. Samples were further diluted to 0.5 M GuaCl with 10 M  
475 EPPS pH 8.5 and digested with an additional 10 ng/µL LysC and 20 ng/µL sequencing grade  
476 Trypsin (Promega) at 37°C for 16 h. Samples were desalted using a SepPak cartridges (Waters)  
477 and then vacuum-dried and resuspended in 1% formic acid before mass spectrometry analysis.

478 **Proteomics peptide measurement.** Samples were analyzed on an EASY-nLC 1200 (Thermo  
479 Fisher Scientific) HPLC coupled to an Orbitrap Fusion Lumos mass spectrometer (Thermo Fisher  
480 Scientific) with Tune version 3.3. Peptides were separated on an Aurora Series emitter column (25  
481 cm × 75 µm ID, 1.6 µm C18) (Ionopticks, Australia) and held at 60°C during separation using an  
482 in-house built column oven over 180 min, applying nonlinear acetonitrile gradients at a constant  
483 flow rate of 350 nL/min. The Fusion Lumos was operated in data dependent mode. The survey  
484 scan was performed at a resolution setting of 120k in orbitrap, followed by MS2 duty cycle of 1.5  
485 s. The normalized collision energy for CID MS2 experiments was set to 30%.

486 Solvent A consisted of 2% DMSO (LC-MS-grade, Life Technologies), 0.125% formic acid (98%+,  
487 TCI America) in water (LC-MS-grade, OmniSolv, VWR), solvent B of 80% acetonitrile (LC-MS-  
488 grade, OmniSolv, Millipore Sigma), 2% DMSO and 0.125% formic acid in water. The following  
489 120 min-gradient with percentage of solvent B were applied at a constant flow rate of 350 nL/min  
490 after thorough equilibration of the column to 0% B: 0% – 6% in 5 min; 6 – 25% in 160 min; 25%  
491 –100% in 10 min; 100% for 5 min. For electrospray ionization, 2.6 kV were applied between  
492 minutes 1 and 113 (or minutes 1 and 83 for fractionated samples) of the gradient through the  
493 column. To avoid carry-over of peptides, 2,2,2-trifluoroethanol (>99% Reagent plus, Millipore  
494 Sigma) was injected in a 30 min wash between each sample.

495 **Proteomics data analysis.** The data was analyzed using GFY software licensed from Harvard  
496 (Nusinow et al., 2020). Thermo Fisher Scientific. raw files were converted to mzXML using  
497 ReAdW.exe. MS2 spectra assignment was performed using the SEQUEST algorithm v.28 (rev.  
498 12) by searching the data against the combined reference proteomes for *Mus Musculus*, *Bos Taurus*,  
499 and all the abundant bacterial families detected in 16S rRNA sequencing (*Bacteroidaceae*,  
500 *Porphyromonadaceae*, *Prevotellaceae*, *Rikenellaceae*, *Muribaculaceae*, *Lachnospiraceae*,  
501 *Ruminococcaceae*, *Erysipelotrichaceae*, *Oscillospiraceae*, *Clostridiaceae*, *Eubacteriaceae*,  
502 *Lactobacillaceae* and *Verrucomicrobiaceae*) acquired from Uniprot on Jan 2021 (SwissProt +  
503 Trembl) along with common contaminants such as human keratins and trypsin. The target-decoy  
504 strategy was used to construct a second database of reverse sequences that were used to estimate  
505 the peptide false discovery rate (Elias and Gygi, 2007). A 20 ppm precursor ion tolerance with the  
506 requirement that both N- and C- terminal peptide ends are consistent with the protease specificities  
507 of LysC and Trypsin was used for SEQUEST searches, two missed cleavage was allowed. NEM  
508 was set as a static modification of cysteine residues (+125.047679 Da). An MS2 spectral  
509 assignment false discovery rate of 0.5% was achieved by applying the target decoy database search  
510 strategy. Linear Discriminant analysis was used for filtering with the following features:  
511 SEQUEST parameters XCorr and unique  $\Delta$ XCorr, absolute peptide ion mass accuracy, peptide  
512 length and charge state. Forward peptides within three standard deviations of the theoretical m/z  
513 of the precursor were used as positive training set. All reverse peptides were used as negative  
514 training set. Linear Discriminant scores were used to sort peptides with at least seven residues and  
515 to filter with the desired cutoff. Furthermore, we performed a filtering step on the protein level by  
516 the “picked” protein FDR approach (Savitski et al., 2015). Protein redundancy was removed by  
517 assigning peptides to the minimal number of proteins which can explain all observed peptide, with  
518 above-described filtering criteria.

519 To quantify the intensities of all the isotopic peaks of the peptides, we used raw intensity. Missed  
520 cleavage peptides (more than one K or R in the peptide) and low signal to FT-noise peptides ( $M_0$   
521  $S/N < 20$ ) were removed. Peptide phylogenetic assignment was performed using Unipept (Gurdeep

522 Singh et al., 2019), ‘Equate I and L’ and ‘Advanced missed cleavage handling’ were not selected.  
523 Only peptides that are specific at a genus level were used for further analysis.

524 **Quantification of newly-synthesized fraction of peptide.** To determine the newly synthesized  
525 fraction of a bacterial peptide in D<sub>2</sub>O drinking water experiment, we first measured the cecal  
526 content free amino acids deuterium labeling pattern using metabolomics. Then, for each peptide,  
527 we simulated the expected isotope envelope pattern if the peptide were old, i.e., unlabeled with  
528 deuterium ( $I_{old}$ ), versus if it were newly synthesized by taking up free amino acids from the cecal  
529 content ( $I_{new}$ ).  $I_{old}$  was calculated based on the peptide’s molecular formula and <sup>13</sup>C, <sup>15</sup>N, <sup>2</sup>H, <sup>17</sup>O,  
530 <sup>18</sup>O, <sup>32</sup>S, <sup>33</sup>S and <sup>36</sup>S natural abundance.  $I_{new}$  was calculated based on the peptide’s sequence and  
531 experimentally observed labeling of the corresponding cecal free amino acids (after natural isotope  
532 correction), and the natural isotope abundance of the unlabeled atoms in the peptide’s formula.  
533 The simulation of expected peptide isotope distribution and fitting was performed using a  
534 MATLAB code: [https://github.com/xxing9703/pepMID\\_simul](https://github.com/xxing9703/pepMID_simul). Exact mass isotopic peaks with  
535 appreciable abundances were bundled by nominal mass into fraction M+0, M+1, ...M+n,  
536 constituting the final simulated spectrum. A least square fit was used to find the scalar  $\theta$  that best  
537 fit the measured peptide isotopic distribution ( $I_{measured}$ ) to a linear combination of  $I_{old}$  and  $I_{new}$ :

538 
$$I_{measured} = I_{old} \times (1 - \theta) + I_{new} \times \theta$$

539 The root mean square error was determined for each peptide fitting, and any fitting with a root  
540 mean square error > 1% was removed. For genus-level turnover quantification, only genera with  
541 more than two measurements were kept in the analysis, with the median value across peptides  
542 reported.

543 **Quantification of contribution of labeled nutrient to peptide.** To determine the contribution of  
544 a <sup>13</sup>C- or <sup>15</sup>N-labeled nutrient to a bacterial peptide, similar to the above approach, we first  
545 measured the cecal content free amino acids <sup>13</sup>C- or <sup>15</sup>N-labeling using metabolomics. Then, for  
546 each peptide, we simulated the expected isotope envelope pattern if the peptide were unlabeled  
547 ( $I_{unlabeled}$ ) versus if it were synthesized from free cecal amino acids ( $I_{free}$ ). A scalar  $\gamma$  (analogous  
548 to  $\theta$  above) can then be determined by fitting the measured peptide isotope distribution ( $I_{measured}$ )  
549 to a linear combination of  $I_{unlabeled}$  and  $I_{free}$ . Note that  $\gamma$  will exceed 1 when a bacterial genus  
550 uses a particular nutrient in excess of that nutrient contribution’s to cecal free amino acids. Because  
551 the <sup>13</sup>C- and <sup>15</sup>N-labeling patterns are simpler than the D<sub>2</sub>O labeling patterns, in lieu of carrying  
552 out this fitting, we instead determined  $\gamma$  (with the same conceptual and mathematical meaning)  
553 using simple algebraic equations.

554 Specifically, we measured  $\gamma$  for each peptide as follows:



555 
$$\gamma = \frac{\varphi_{\text{measured}} - \varphi_{\text{unlabeled}}}{\varphi_{\text{free}} - \varphi_{\text{unlabeled}}}$$

556 where (with the exception of  $^{13}\text{C}$ -protein feeding data, discussed immediately below)  $\varphi$  is the  
557 average number of extra neutrons in a given peptide (or simulated peptide), relative to the M+0  
558 form. This was calculated based on the experimentally observed (or simulated, as above) fraction  
559 of M+0, M+1, M+2, and M+3, which account for > 90% of the isotopes for each peptide (with  
560 more heavily labeled forms too low abundance and noisy to contribute productively to the  
561 measurements):

562 
$$\varphi = \frac{\sum_{i=0}^3 i \cdot M_i}{\sum_{i=0}^3 M_i}$$

563 For the  $^{13}\text{C}$ -protein feeding experiments, the most readily detected labeled forms involve  
564 incorporation of a single midsized U- $^{13}\text{C}$ -amino acid, which manifests as M+5 or M+6 peptide  
565 labeling. Other isotopic forms were sufficiently noisier, as to render their inclusion unhelpful.  
566 Accordingly, we calculated  $\gamma$  based on  $\varphi'$ :

567 
$$\varphi' = \frac{M_5 + M_6}{M_0 + M_5 + M_6}$$

568 The above equations give nearly identical values for  $\gamma$  as fitting (as done to determine  $\theta$ ).

569 For genus-level measurements of feedstock contributions, only genera with more than 3 peptides  
570 measured per mouse was kept in the analysis, with the median value across peptides reported as  
571  $\gamma_{\text{genus}}$ . Only genera that were consistently detected in proteomics, and the family of that genera  
572 detected (>0.5%) in 16S rRNA sequencing were analyzed. The product of  $\gamma_{\text{genus}}$  and the  
573 contribution of each nutrient to cecal free amino acids ( $L_{AA\_avg \leftarrow \text{nutrient}}$ ) was used to determine  
574 the contribution of each nutrient to bacterial genus ( $f_{\text{genus} \leftarrow \text{nutrient}}$ ):

575 
$$f_{\text{genus} \leftarrow \text{nutrient}} = \gamma_{\text{genus}} \times L_{AA\_avg \leftarrow \text{nutrient}}$$

576 where the contribution of each nutrient to bacterial protein pool ( $L_{AA\_avg \leftarrow \text{Nutrient}}$ ) was calculated  
577 as the average labeling across amino acids, weighted based on their abundance in that genus'  
578 protein and corrected for fraction of the nutrient interest labeled ( $T$ ):

579 
$$L_{AA\_avg \leftarrow \text{nutrient}} = \sum f_{\text{Cecal\_AA} \leftarrow \text{nutrient}} \times w\%_{AA, \text{bacteria}} / T$$

580 with  $w\%_{AA,bacteria}$  taken from literature (Purser and Buechler, 1966).

581 **Statistical analysis.** A two-tailed, unpaired student's t-test was used to calculate P values, with  
582  $P < 0.05$  used to determine statistical significance.

583 **Author contributions and information.** X.Z., and J.D.R came up with general approach and X.Z.  
584 performed most of the experiments and data analysis. C.J. worked intensively with X.Z. to develop  
585 the experimental strategy. M.W. designed and enabled the proteomic measurements. X.X. wrote  
586 the MATLAB code. M.G., F.C.K., and M.D.N. contributed to proteomics method development.  
587 J.G.L. and M.S.D. provided microbiome expertise and performed 16S rRNA sequencing. A.R.  
588 assisted with isotope tracing. W.L. performed ammonia measurement. X.Z., C.J., and J.D.R. wrote  
589 the paper. All of the authors discussed the results and commented on the paper.

## 590 **References**

- 591 Albenberg, L., Esipova, T.V., Judge, C.P., Bittinger, K., Chen, J., Laughlin, A., Grunberg, S.,  
592 Baldassano, R.N., Lewis, J.D., Li, H., Thom, S.R., Bushman, F.D., Vinogradov, S.A., Wu,  
593 G.D., 2014. Correlation Between Intraluminal Oxygen Gradient and Radial Partitioning of  
594 Intestinal Microbiota. *Gastroenterology* 147, 1055-1063.e8.  
595 <https://doi.org/10.1053/j.gastro.2014.07.020>
- 596 Arab, J.P., Karpen, S.J., Dawson, P.A., Arrese, M., Trauner, M., 2017. Bile acids and nonalcoholic  
597 fatty liver disease: Molecular insights and therapeutic perspectives. *Hepatology* Baltim. Md  
598 65, 350–362. <https://doi.org/10.1002/hep.28709>
- 599 Bartman, C.R., TeSlaa, T., Rabinowitz, J.D., 2021. Quantitative flux analysis in mammals. *Nat.*  
600 *Metab.* 3, 896–908. <https://doi.org/10.1038/s42255-021-00419-2>
- 601 Berry, D., Mader, E., Lee, T.K., Woebken, D., Wang, Y., Zhu, D., Palatinszky, M., Schintlmeister,  
602 A., Schmid, M.C., Hanson, B.T., Shterzer, N., Mizrahi, I., Rauch, I., Decker, T., Bocklitz,  
603 T., Popp, J., Gibson, C.M., Fowler, P.W., Huang, W.E., Wagner, M., 2015. Tracking heavy  
604 water (D2O) incorporation for identifying and sorting active microbial cells. *Proc. Natl.*  
605 *Acad. Sci.* 112, E194–E203. <https://doi.org/10.1073/pnas.1420406112>
- 606 Berry, D., Stecher, B., Schintlmeister, A., Reichert, J., Brugiroux, S., Wild, B., Wanek, W., Richter,  
607 A., Rauch, I., Decker, T., Loy, A., Wagner, M., 2013. Host-compound foraging by  
608 intestinal microbiota revealed by single-cell stable isotope probing. *Proc. Natl. Acad. Sci.*  
609 110, 4720–4725. <https://doi.org/10.1073/pnas.1219247110>
- 610 Bokulich, N.A., Kaehler, B.D., Rideout, J.R., Dillon, M., Bolyen, E., Knight, R., Huttley, G.A.,  
611 Gregory Caporaso, J., 2018. Optimizing taxonomic classification of marker-gene amplicon  
612 sequences with QIIME 2's q2-feature-classifier plugin. *Microbiome* 6, 90.  
613 <https://doi.org/10.1186/s40168-018-0470-z>

- 614 Bolyen, E., Rideout, J.R., Dillon, M.R., Bokulich, N.A., Abnet, C.C., Al-Ghalith, G.A., Alexander,  
615 H., Alm, E.J., Arumugam, M., Asnicar, F., Bai, Y., Bisanz, J.E., Bittinger, K., Brejnrod,  
616 A., Brislawn, C.J., Brown, C.T., Callahan, B.J., Caraballo-Rodríguez, A.M., Chase, J.,  
617 Cope, E.K., Da Silva, R., Diener, C., Dorrestein, P.C., Douglas, G.M., Durall, D.M.,  
618 Duvallet, C., Edwardson, C.F., Ernst, M., Estaki, M., Fouquier, J., Gauglitz, J.M., Gibbons,  
619 S.M., Gibson, D.L., Gonzalez, A., Gorlick, K., Guo, J., Hillmann, B., Holmes, S., Holste,  
620 H., Huttenhower, C., Huttley, G.A., Janssen, S., Jarmusch, A.K., Jiang, L., Kaehler, B.D.,  
621 Kang, K.B., Keefe, C.R., Keim, P., Kelley, S.T., Knights, D., Koester, I., Kosciolk, T.,  
622 Kreps, J., Langille, M.G.I., Lee, J., Ley, R., Liu, Y.-X., Loftfield, E., Lozupone, C., Maher,  
623 M., Marotz, C., Martin, B.D., McDonald, D., McIver, L.J., Melnik, A.V., Metcalf, J.L.,  
624 Morgan, S.C., Morton, J.T., Naimey, A.T., Navas-Molina, J.A., Nothias, L.F., Orchanian,  
625 S.B., Pearson, T., Peoples, S.L., Petras, D., Preuss, M.L., Pruesse, E., Rasmussen, L.B.,  
626 Rivers, A., Robeson, M.S., Rosenthal, P., Segata, N., Shaffer, M., Shiffer, A., Sinha, R.,  
627 Song, S.J., Spear, J.R., Swafford, A.D., Thompson, L.R., Torres, P.J., Trinh, P., Tripathi,  
628 A., Turnbaugh, P.J., Ul-Hasan, S., van der Hooft, J.J.J., Vargas, F., Vázquez-Baeza, Y.,  
629 Vogtmann, E., von Hippel, M., Walters, W., Wan, Y., Wang, M., Warren, J., Weber, K.C.,  
630 Williamson, C.H.D., Willis, A.D., Xu, Z.Z., Zaneveld, J.R., Zhang, Y., Zhu, Q., Knight,  
631 R., Caporaso, J.G., 2019. Reproducible, interactive, scalable and extensible microbiome  
632 data science using QIIME 2. *Nat. Biotechnol.* 37, 852–857.  
633 <https://doi.org/10.1038/s41587-019-0209-9>
- 634 Callahan, B.J., McMurdie, P.J., Rosen, M.J., Han, A.W., Johnson, A.J.A., Holmes, S.P., 2016.  
635 DADA2: High-resolution sample inference from Illumina amplicon data. *Nat. Methods* 13,  
636 581–583. <https://doi.org/10.1038/nmeth.3869>
- 637 Campbell, C., McKenney, P.T., Konstantinovskiy, D., Isaeva, O.I., Schizas, M., Verter, J., Mai, C.,  
638 Jin, W.-B., Guo, C.-J., Violante, S., Ramos, R.J., Cross, J.R., Kadaveru, K., Hambor, J.,  
639 Rudensky, A.Y., 2020. Bacterial metabolism of bile acids promotes generation of  
640 peripheral regulatory T cells. *Nature* 1–5. <https://doi.org/10.1038/s41586-020-2193-0>
- 641 Caporaso, J.G., Lauber, C.L., Walters, W.A., Berg-Lyons, D., Huntley, J., Fierer, N., Owens, S.M.,  
642 Betley, J., Fraser, L., Bauer, M., Gormley, N., Gilbert, J.A., Smith, G., Knight, R., 2012.  
643 Ultra-high-throughput microbial community analysis on the Illumina HiSeq and MiSeq  
644 platforms. *ISME J.* 6, 1621–1624. <https://doi.org/10.1038/ismej.2012.8>
- 645 Dalile, B., Oudenhove, L.V., Vervliet, B., Verbeke, K., 2019. The role of short-chain fatty acids  
646 in microbiota–gut–brain communication. *Nat. Rev. Gastroenterol. Hepatol.* 1.  
647 <https://doi.org/10.1038/s41575-019-0157-3>
- 648 David, L.A., Maurice, C.F., Carmody, R.N., Gootenberg, D.B., Button, J.E., Wolfe, B.E., Ling,  
649 A.V., Devlin, A.S., Varma, Y., Fischbach, M.A., Biddinger, S.B., Dutton, R.J., Turnbaugh,  
650 P.J., 2014. Diet rapidly and reproducibly alters the human gut microbiome. *Nature* 505,  
651 559–563. <https://doi.org/10.1038/nature12820>

- 652 De Vadder, F., Kovatcheva-Datchary, P., Goncalves, D., Vinera, J., Zitoun, C., Duchamp, A.,  
653 Bäckhed, F., Mithieux, G., 2014. Microbiota-generated metabolites promote metabolic  
654 benefits via gut-brain neural circuits. *Cell* 156, 84–96.  
655 <https://doi.org/10.1016/j.cell.2013.12.016>
- 656 Desai, M.S., Seekatz, A.M., Koropatkin, N.M., Kamada, N., Hickey, C.A., Wolter, M., Pudlo,  
657 N.A., Kitamoto, S., Terrapon, N., Muller, A., Young, V.B., Henrissat, B., Wilmes, P.,  
658 Stappenbeck, T.S., Núñez, G., Martens, E.C., 2016. A Dietary Fiber-Deprived Gut  
659 Microbiota Degrades the Colonic Mucus Barrier and Enhances Pathogen Susceptibility.  
660 *Cell* 167, 1339–1353.e21. <https://doi.org/10.1016/j.cell.2016.10.043>
- 661 Elias, J.E., Gygi, S.P., 2007. Target-decoy search strategy for increased confidence in large-scale  
662 protein identifications by mass spectrometry. *Nat. Methods* 4, 207–214.  
663 <https://doi.org/10.1038/nmeth1019>
- 664 Faubert, B., Li, K.Y., Cai, L., Hensley, C.T., Kim, J., Zacharias, L.G., Yang, C., Do, Q.N.,  
665 Doucette, S., Burguete, D., Li, H., Huet, G., Yuan, Q., Wigal, T., Butt, Y., Ni, M., Torrealba,  
666 J., Oliver, D., Lenkinski, R.E., Malloy, C.R., Wachsmann, J.W., Young, J.D., Kernstine,  
667 K., DeBerardinis, R.J., 2017. Lactate Metabolism in Human Lung Tumors. *Cell* 171, 358-  
668 371.e9. <https://doi.org/10.1016/j.cell.2017.09.019>
- 669 Fernández-García, J., Altea-Manzano, P., Pranzini, E., Fendt, S.-M., 2020. Stable Isotopes for  
670 Tracing Mammalian-Cell Metabolism In Vivo. *Trends Biochem. Sci.* 45, 185–201.  
671 <https://doi.org/10.1016/j.tibs.2019.12.002>
- 672 Funabashi, M., Grove, T.L., Wang, M., Varma, Y., McFadden, M.E., Brown, L.C., Guo, C.,  
673 Higginbottom, S., Almo, S.C., Fischbach, M.A., 2020. A metabolic pathway for bile acid  
674 dehydroxylation by the gut microbiome. *Nature* 582, 566–570.  
675 <https://doi.org/10.1038/s41586-020-2396-4>
- 676 Garrett, W.S., 2015. Cancer and the microbiota. *Science* 348, 80–86.  
677 <https://doi.org/10.1126/science.aaa4972>
- 678 Gupta, M., Sonnett, M., Ryazanova, L., Presler, M., Wühr, M., 2018. Quantitative Proteomics of  
679 *Xenopus* Embryos I, Sample Preparation, in: Vleminckx, K. (Ed.), *Xenopus: Methods and*  
680 *Protocols, Methods in Molecular Biology*. Springer, New York, NY, pp. 175–194.  
681 [https://doi.org/10.1007/978-1-4939-8784-9\\_13](https://doi.org/10.1007/978-1-4939-8784-9_13)
- 682 Gurdeep Singh, R., Tanca, A., Palomba, A., Van der Jeugt, F., Verschaffelt, P., Uzzau, S., Martens,  
683 L., Dawyndt, P., Mesuere, B., 2019. Unipept 4.0: Functional Analysis of Metaproteome  
684 Data. *J. Proteome Res.* 18, 606–615. <https://doi.org/10.1021/acs.jproteome.8b00716>
- 685 Halestrap, A.P., Price, N.T., 1999. The proton-linked monocarboxylate transporter (MCT) family:  
686 structure, function and regulation. *Biochem. J.* 343, 281–299.
- 687 Han, S., Van Treuren, W., Fischer, C.R., Merrill, B.D., DeFelice, B.C., Sanchez, J.M.,  
688 Higginbottom, S.K., Guthrie, L., Fall, L.A., Dodd, D., Fischbach, M.A., Sonnenburg, J.L.,  
689 2021. A metabolomics pipeline for the mechanistic interrogation of the gut microbiome.  
690 *Nature* 595, 415–420. <https://doi.org/10.1038/s41586-021-03707-9>

- 691 Hang, S., Paik, D., Yao, L., Kim, E., Trinath, J., Lu, J., Ha, S., Nelson, B.N., Kelly, S.P., Wu, L.,  
692 Zheng, Y., Longman, R.S., Rastinejad, F., Devlin, A.S., Krout, M.R., Fischbach, M.A.,  
693 Littman, D.R., Huh, J.R., 2019. Bile acid metabolites control T H 17 and T reg cell  
694 differentiation. *Nature* 576, 143–148. <https://doi.org/10.1038/s41586-019-1785-z>
- 695 Holmes, A.J., Chew, Y.V., Colakoglu, F., Cliff, J.B., Klaassens, E., Read, M.N., Solon-Biet, S.M.,  
696 McMahan, A.C., Cogger, V.C., Ruohonen, K., Raubenheimer, D., Le Couteur, D.G.,  
697 Simpson, S.J., 2017. Diet-Microbiome Interactions in Health Are Controlled by Intestinal  
698 Nitrogen Source Constraints. *Cell Metab.* 25, 140–151.  
699 <https://doi.org/10.1016/j.cmet.2016.10.021>
- 700 Holmes, W.E., Angel, T.E., Li, K.W., Hellerstein, M.K., 2015. Chapter Seven - Dynamic  
701 Proteomics: In Vivo Proteome-Wide Measurement of Protein Kinetics Using Metabolic  
702 Labeling, in: Metallo, C.M. (Ed.), *Methods in Enzymology, Metabolic Analysis Using*  
703 *Stable Isotopes*. Academic Press, pp. 219–276. <https://doi.org/10.1016/bs.mie.2015.05.018>
- 704 Hui, S., Ghergurovich, J.M., Morscher, R.J., Jang, C., Teng, X., Lu, W., Esparza, L.A., Reya, T.,  
705 Zhan, L., Guo, J.Y., White, E., Rabinowitz, J.D., 2017. Glucose feeds the TCA cycle via  
706 circulating lactate. *Nature* 551, 115–118. <https://doi.org/10.1038/nature24057>
- 707 Hunter, J.D., 2007. Matplotlib: A 2D Graphics Environment. *Comput. Sci. Eng.* 9, 90–95.  
708 <https://doi.org/10.1109/MCSE.2007.55>
- 709 Jang, C., Hui, S., Lu, W., Cowan, A.J., Morscher, R.J., Lee, G., Liu, W., Tesz, G.J., Birnbaum,  
710 M.J., Rabinowitz, J.D., 2018. The Small Intestine Converts Dietary Fructose into Glucose  
711 and Organic Acids. *Cell Metab.* 27, 351-361.e3.  
712 <https://doi.org/10.1016/j.cmet.2017.12.016>
- 713 Koh, A., Molinaro, A., Ståhlman, M., Khan, M.T., Schmidt, C., Mannerås-Holm, L., Wu, H.,  
714 Carreras, A., Jeong, H., Olofsson, L.E., Bergh, P.-O., Gerdes, V., Hartstra, A., Brauw, M.  
715 de, Perkins, R., Nieuwdorp, M., Bergström, G., Bäckhed, F., 2018. Microbially Produced  
716 Imidazole Propionate Impairs Insulin Signaling through mTORC1. *Cell* 175, 947-961.e17.  
717 <https://doi.org/10.1016/j.cell.2018.09.055>
- 718 Koh, A., Vadder, F.D., Kovatcheva-Datchary, P., Bäckhed, F., 2016. From Dietary Fiber to Host  
719 Physiology: Short-Chain Fatty Acids as Key Bacterial Metabolites. *Cell* 165, 1332–1345.  
720 <https://doi.org/10.1016/j.cell.2016.05.041>
- 721 Lai, Y., Liu, C.-W., Yang, Y., Hsiao, Y.-C., Ru, H., Lu, K., 2021. High-coverage metabolomics  
722 uncovers microbiota-driven biochemical landscape of interorgan transport and gut-brain  
723 communication in mice. *Nat. Commun.* 12, 6000. [https://doi.org/10.1038/s41467-021-](https://doi.org/10.1038/s41467-021-26209-8)  
724 [26209-8](https://doi.org/10.1038/s41467-021-26209-8)
- 725 Li, H., Limenitakis, J.P., Fuhrer, T., Geuking, M.B., Lawson, M.A., Wyss, M., Brugiroux, S.,  
726 Keller, I., Macpherson, J.A., Rupp, S., Stolp, B., Stein, J.V., Stecher, B., Sauer, U., McCoy,  
727 K.D., Macpherson, A.J., 2015. The outer mucus layer hosts a distinct intestinal microbial  
728 niche. *Nat. Commun.* 6, 8292. <https://doi.org/10.1038/ncomms9292>

- 729 Liu, Z., Liu, H.-Y., Zhou, H., Zhan, Q., Lai, W., Zeng, Q., Ren, H., Xu, D., 2017. Moderate-  
730 Intensity Exercise Affects Gut Microbiome Composition and Influences Cardiac Function  
731 in Myocardial Infarction Mice. *Front. Microbiol.* 8.  
732 <https://doi.org/10.3389/fmicb.2017.01687>
- 733 Lund, P.J., Gates, L.A., Leboeuf, M., Smith, S.A., Chau, L., Friedman, E.S., Lopes, M., Saiman,  
734 Y., Kim, M.S., Petucci, C., Allis, C.D., Wu, G.D., Garcia, B.A., 2021. Stable Isotope  
735 Tracing in vivo Reveals A Metabolic Bridge Linking the Microbiota to Host Histone  
736 Acetylation. *bioRxiv* 2021.07.05.450926. <https://doi.org/10.1101/2021.07.05.450926>
- 737 Madsen, L., Myrmel, L.S., Fjære, E., Liaset, B., Kristiansen, K., 2017. Links between Dietary  
738 Protein Sources, the Gut Microbiota, and Obesity. *Front. Physiol.* 8, 1047.  
739 <https://doi.org/10.3389/fphys.2017.01047>
- 740 Mager, L.F., Burkhard, R., Pett, N., Cooke, N.C.A., Brown, K., Ramay, H., Paik, S., Stagg, J.,  
741 Groves, R.A., Gallo, M., Lewis, I.A., Geuking, M.B., McCoy, K.D., 2020. Microbiome-  
742 derived inosine modulates response to checkpoint inhibitor immunotherapy. *Science*.  
743 <https://doi.org/10.1126/science.abc3421>
- 744 McCabe, B.J., Previs, S.F., 2004. Using isotope tracers to study metabolism: application in mouse  
745 models. *Metab. Eng.* 6, 25–35. <https://doi.org/10.1016/j.ymben.2003.09.003>
- 746 McDonald, D., Price, M.N., Goodrich, J., Nawrocki, E.P., DeSantis, T.Z., Probst, A., Andersen,  
747 G.L., Knight, R., Hugenholtz, P., 2012. An improved Greengenes taxonomy with explicit  
748 ranks for ecological and evolutionary analyses of bacteria and archaea. *ISME J.* 6, 610–  
749 618. <https://doi.org/10.1038/ismej.2011.139>
- 750 McKinney, W., 2010. Data Structures for Statistical Computing in Python. *Proc. 9th Python Sci.*  
751 *Conf.* 56–61. <https://doi.org/10.25080/Majora-92bf1922-00a>
- 752 Munukka, E., Ahtiainen, J.P., Puigbó, P., Jalkanen, S., Pakkala, K., Keskitalo, A., Kujala, U.M.,  
753 Pietilä, S., Hollmén, M., Elo, L., Huovinen, P., D’Auria, G., Pekkala, S., 2018. Six-Week  
754 Endurance Exercise Alters Gut Metagenome That Is not Reflected in Systemic Metabolism  
755 in Over-weight Women. *Front. Microbiol.* 9. <https://doi.org/10.3389/fmicb.2018.02323>
- 756 Nemet, I., Saha, P.P., Gupta, N., Zhu, W., Romano, K.A., Skye, S.M., Cajka, T., Mohan, M.L., Li,  
757 L., Wu, Y., Funabashi, M., Ramer-Tait, A.E., Prasad, S.V.N., Fiehn, O., Rey, F.E., Tang,  
758 W.H.W., Fischbach, M.A., DiDonato, J.A., Hazen, S.L., 2020. A Cardiovascular Disease-  
759 Linked Gut Microbial Metabolite Acts via Adrenergic Receptors. *Cell* 180, 862-877.e22.  
760 <https://doi.org/10.1016/j.cell.2020.02.016>
- 761 Nusinow, D.P., Szpyt, J., Ghandi, M., Rose, C.M., McDonald, E.R., Kalocsay, M., Jané-Valbuena,  
762 J., Gelfand, E., Schweppe, D.K., Jedrychowski, M., Golji, J., Porter, D.A., Rejtar, T., Wang,  
763 Y.K., Kryukov, G.V., Stegmeier, F., Erickson, B.K., Garraway, L.A., Sellers, W.R., Gygi,  
764 S.P., 2020. Quantitative Proteomics of the Cancer Cell Line Encyclopedia. *Cell* 180, 387-  
765 402.e16. <https://doi.org/10.1016/j.cell.2019.12.023>
- 766 Oberbach, A., Haange, S.-B., Schlichting, N., Heinrich, M., Lehmann, S., Till, H., Hugenholtz, F.,  
767 Kullnick, Y., Smidt, H., Frank, K., Seifert, J., Jehmlich, N., von Bergen, M., 2017.

- 768 Metabolic in Vivo Labeling Highlights Differences of Metabolically Active Microbes from  
769 the Mucosal Gastrointestinal Microbiome between High-Fat and Normal Chow Diet. *J.*  
770 *Proteome Res.* 16, 1593–1604. <https://doi.org/10.1021/acs.jproteome.6b00973>
- 771 O'Brien, J.J., Narayan, V., Wong, Y., Seitzer, P., Sandoval, C.M., Haste, N., Smith, M., Rad, R.,  
772 Gaun, A., Baker, A., Kukurugya, M., Martin-McNulty, B., Zhang, C., Kolumam, G.,  
773 Sidrauski, C., Jojic, V., McAllister, F., Bennett, B., Buffenstein, R., 2020. Precise  
774 Estimation of In Vivo Protein Turnover Rates. *bioRxiv* 2020.11.10.377440.  
775 <https://doi.org/10.1101/2020.11.10.377440>
- 776 Purser, D.B., Buechler, S.M., 1966. Amino Acid Composition of Rumen Organisms. *J. Dairy Sci.*  
777 49, 81–84. [https://doi.org/10.3168/jds.S0022-0302\(66\)87791-3](https://doi.org/10.3168/jds.S0022-0302(66)87791-3)
- 778 Qin, J., Li, R., Raes, J., Arumugam, M., Burgdorf, K.S., Manichanh, C., Nielsen, T., Pons, N.,  
779 Levenez, F., Yamada, T., Mende, D.R., Li, J., Xu, J., Li, Shaochuan, Li, D., Cao, J., Wang,  
780 B., Liang, H., Zheng, H., Xie, Y., Tap, J., Lepage, P., Bertalan, M., Batto, J.-M., Hansen,  
781 T., Le Paslier, D., Linneberg, A., Nielsen, H.B., Pelletier, E., Renault, P., Sicheritz-Ponten,  
782 T., Turner, K., Zhu, H., Yu, C., Li, Shengting, Jian, M., Zhou, Y., Li, Y., Zhang, X., Li,  
783 Songgang, Qin, N., Yang, H., Wang, Jian, Brunak, S., Doré, J., Guarner, F., Kristiansen,  
784 K., Pedersen, O., Parkhill, J., Weissenbach, J., Bork, P., Ehrlich, S.D., Wang, Jun, 2010. A  
785 human gut microbial gene catalogue established by metagenomic sequencing. *Nature* 464,  
786 59–65. <https://doi.org/10.1038/nature08821>
- 787 Quinn, R.A., Melnik, A.V., Vrbanc, A., Fu, T., Patras, K.A., Christy, M.P., Bodai, Z., Belda-  
788 Ferre, P., Tripathi, A., Chung, L.K., Downes, M., Welch, R.D., Quinn, M., Humphrey, G.,  
789 Panitchpakdi, M., Weldon, K.C., Aksenov, A., da Silva, R., Avila-Pacheco, J., Clish, C.,  
790 Bae, S., Mallick, H., Franzosa, E.A., Lloyd-Price, J., Bussell, R., Thron, T., Nelson, A.T.,  
791 Wang, M., Leszczynski, E., Vargas, F., Gauglitz, J.M., Meehan, M.J., Gentry, E., Arthur,  
792 T.D., Komor, A.C., Poulsen, O., Boland, B.S., Chang, J.T., Sandborn, W.J., Lim, M., Garg,  
793 N., Lumeng, J.C., Xavier, R.J., Kazmierczak, B.I., Jain, R., Egan, M., Rhee, K.E., Ferguson,  
794 D., Raffatellu, M., Vlamakis, H., Haddad, G.G., Siegel, D., Huttenhower, C., Mazmanian,  
795 S.K., Evans, R.M., Nizet, V., Knight, R., Dorrestein, P.C., 2020. Global chemical effects  
796 of the microbiome include new bile-acid conjugations. *Nature* 579, 123–129.  
797 <https://doi.org/10.1038/s41586-020-2047-9>
- 798 Reese, A.T., Pereira, F.C., Schintlmeister, A., Berry, D., Wagner, M., Hale, L.P., Wu, A., Jiang,  
799 S., Durand, H.K., Zhou, X., Premont, R.T., Diehl, A.M., O'Connell, T.M., Alberts, S.C.,  
800 Kartzinell, T.R., Pringle, R.M., Dunn, R.R., Wright, J.P., David, L.A., 2018. Microbial  
801 nitrogen limitation in the mammalian large intestine. *Nat. Microbiol.* 3, 1441–1450.  
802 <https://doi.org/10.1038/s41564-018-0267-7>
- 803 Ridlon, J.M., Kang, D.J., Hylemon, P.B., Bajaj, J.S., 2014. Bile Acids and the Gut Microbiome.  
804 *Curr. Opin. Gastroenterol.* 30, 332–338. <https://doi.org/10.1097/MOG.0000000000000057>

- 805 Savitski, M.M., Wilhelm, M., Hahne, H., Kuster, B., Bantscheff, M., 2015. A Scalable Approach  
806 for Protein False Discovery Rate Estimation in Large Proteomic Data Sets. *Mol. Cell.*  
807 *Proteomics MCP* 14, 2394–2404. <https://doi.org/10.1074/mcp.M114.046995>
- 808 Scheiman, J., Lubner, J.M., Chavkin, T.A., MacDonald, T., Tung, A., Pham, L.-D., Wibowo, M.C.,  
809 Wurth, R.C., Punthambaker, S., Tierney, B.T., Yang, Z., Hattab, M.W., Avila-Pacheco, J.,  
810 Clish, C.B., Lessard, S., Church, G.M., Kostic, A.D., 2019. Meta-omics analysis of elite  
811 athletes identifies a performance-enhancing microbe that functions via lactate metabolism.  
812 *Nat. Med.* 1. <https://doi.org/10.1038/s41591-019-0485-4>
- 813 Sicard, J.-F., Le Bihan, G., Vogeleer, P., Jacques, M., Harel, J., 2017. Interactions of Intestinal  
814 Bacteria with Components of the Intestinal Mucus. *Front. Cell. Infect. Microbiol.* 7.  
815 <https://doi.org/10.3389/fcimb.2017.00387>
- 816 Tang, W.H.W., Wang, Z., Levison, B.S., Koeth, R.A., Britt, E.B., Fu, X., Wu, Y., Hazen, S.L.,  
817 2013. Intestinal Microbial Metabolism of Phosphatidylcholine and Cardiovascular Risk  
818 [WWW Document]. <http://dx.doi.org/10.1056/NEJMoa1109400>.  
819 <https://doi.org/10.1056/NEJMoa1109400>
- 820 Wali, J.A., Milner, A.J., Luk, A.W.S., Pulpitel, T.J., Dodgson, T., Facey, H.J.W., Wahl, D.,  
821 Kebede, M.A., Senior, A.M., Sullivan, M.A., Brandon, A.E., Yau, B., Lockwood, G.P.,  
822 Koay, Y.C., Ribeiro, R., Solon-Biet, S.M., Bell-Anderson, K.S., O’Sullivan, J.F., Macia,  
823 L., Forbes, J.M., Cooney, G.J., Cogger, V.C., Holmes, A., Raubenheimer, D., Le Couteur,  
824 D.G., Simpson, S.J., 2021. Impact of dietary carbohydrate type and protein–carbohydrate  
825 interaction on metabolic health. *Nat. Metab.* 1–19. [https://doi.org/10.1038/s42255-021-](https://doi.org/10.1038/s42255-021-00393-9)  
826 [00393-9](https://doi.org/10.1038/s42255-021-00393-9)
- 827 Wang, Z., Klipfell, E., Bennett, B.J., Koeth, R., Levison, B.S., DuGar, B., Feldstein, A.E., Britt,  
828 E.B., Fu, X., Chung, Y.-M., Wu, Y., Schauer, P., Smith, J.D., Allayee, H., Tang, W.H.W.,  
829 DiDonato, J.A., Lysis, A.J., Hazen, S.L., 2011. Gut flora metabolism of  
830 phosphatidylcholine promotes cardiovascular disease. *Nature* 472, 57–63.  
831 <https://doi.org/10.1038/nature09922>
- 832 Wikoff, W.R., Anfora, A.T., Liu, J., Schultz, P.G., Lesley, S.A., Peters, E.C., Siuzdak, G., 2009.  
833 Metabolomics analysis reveals large effects of gut microflora on mammalian blood  
834 metabolites. *Proc. Natl. Acad. Sci.* 106, 3698–3703.  
835 <https://doi.org/10.1073/pnas.0812874106>
- 836 Wolfe, R.R., 1984. Tracers in metabolic research: radioisotope and stable isotope/mass  
837 spectrometry methods. *Lab. Res. Methods Biol. Med.* 9, 1–287.
- 838 Wong, J.M.W., Jenkins, D.J.A., 2007. Carbohydrate Digestibility and Metabolic Effects. *J. Nutr.*  
839 137, 2539S–2546S. <https://doi.org/10.1093/jn/137.11.2539S>
- 840 Wühr, M., Freeman, R.M., Presler, M., Horb, M.E., Peshkin, L., Gygi, S.P., Kirschner, M.W.,  
841 2014. Deep Proteomics of the *Xenopus laevis* Egg using an mRNA-Derived Reference  
842 Database. *Curr. Biol.* 24, 1467–1475. <https://doi.org/10.1016/j.cub.2014.05.044>



843 Yasuda, K., Oh, K., Ren, B., Tickle, T.L., Franzosa, E.A., Wachtman, L.M., Miller, A.D.,  
844 Westmoreland, S.V., Mansfield, K.G., Vallender, E.J., Miller, G.M., Rowlett, J.K., Gevers,  
845 D., Huttenhower, C., Morgan, X.C., 2015. Biogeography of the Intestinal Mucosal and  
846 Lumenal Microbiome in the Rhesus Macaque. *Cell Host Microbe* 17, 385–391.  
847 <https://doi.org/10.1016/j.chom.2015.01.015>

848 Yoshimoto, S., Loo, T.M., Atarashi, K., Kanda, H., Sato, S., Oyadomari, S., Iwakura, Y., Oshima,  
849 K., Morita, H., Hattori, M., Honda, K., Ishikawa, Y., Hara, E., Ohtani, N., 2013. Obesity-  
850 induced gut microbial metabolite promotes liver cancer through senescence secretome.  
851 *Nature* 499, 97–101. <https://doi.org/10.1038/nature12347>

852 Zhang, X., Ning, Z., Mayne, J., Deeke, S.A., Li, J., Starr, A.E., Chen, R., Singleton, R., Butcher,  
853 J., Mack, D.R., Stintzi, A., Figeys, D., 2016a. In Vitro Metabolic Labeling of Intestinal  
854 Microbiota for Quantitative Metaproteomics. *Anal. Chem.* 88, 6120–6125.  
855 <https://doi.org/10.1021/acs.analchem.6b01412>

856 Zhang, X., Ning, Z., Mayne, J., Moore, J.I., Li, J., Butcher, J., Deeke, S.A., Chen, R., Chiang, C.-  
857 K., Wen, M., Mack, D., Stintzi, A., Figeys, D., 2016b. MetaPro-IQ: a universal  
858 metaproteomic approach to studying human and mouse gut microbiota. *Microbiome* 4, 31.  
859 <https://doi.org/10.1186/s40168-016-0176-z>

860 Zhao, S., Jang, C., Liu, J., Uehara, K., Gilbert, M., Izzo, L., Zeng, X., Trefely, S., Fernandez, S.,  
861 Carrer, A., Miller, K.D., Schug, Z.T., Snyder, N.W., Gade, T.P., Titchenell, P.M.,  
862 Rabinowitz, J.D., Wellen, K.E., 2020. Dietary fructose feeds hepatic lipogenesis via  
863 microbiota-derived acetate. *Nature* 579, 586–591. <https://doi.org/10.1038/s41586-020-2101-7>

864

865

866

867

868

869

870

871

872

873

874

875

876

### A Microbiome metabolites in Portal Vein

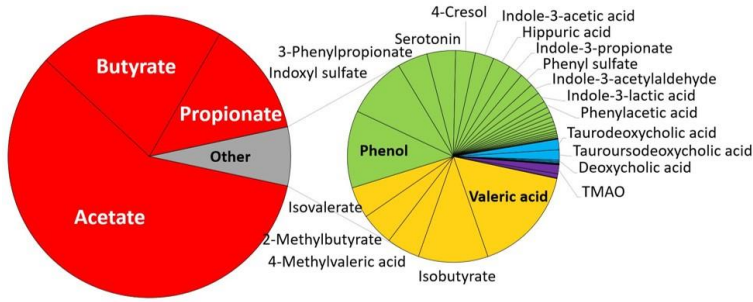

### B

| Diet 1 | <sup>13</sup> C-Starch | Inulin                 | Protein                 |
|--------|------------------------|------------------------|-------------------------|
| Diet 2 | Starch                 | <sup>13</sup> C-Inulin | Protein                 |
| Diet 3 | Starch                 | Inulin                 | <sup>13</sup> C-AA      |
| Diet 4 | Starch                 | Inulin                 | <sup>13</sup> C-protein |

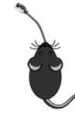

Portal blood, cecal content time course LC-MS

### C

#### Inulin vs Starch

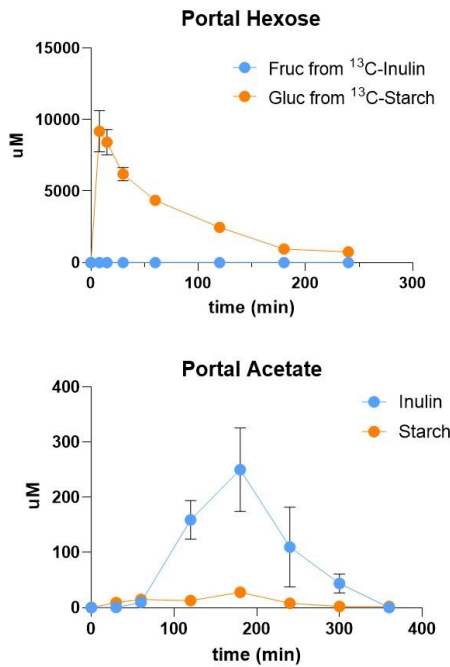

### E

#### Amino acids vs. Algal Protein

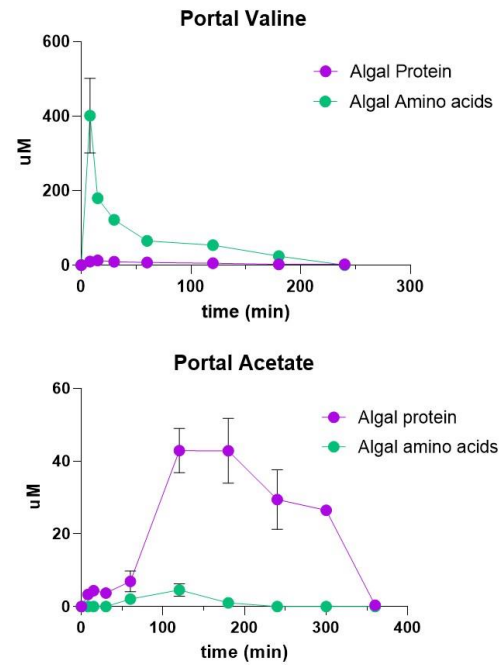

### D

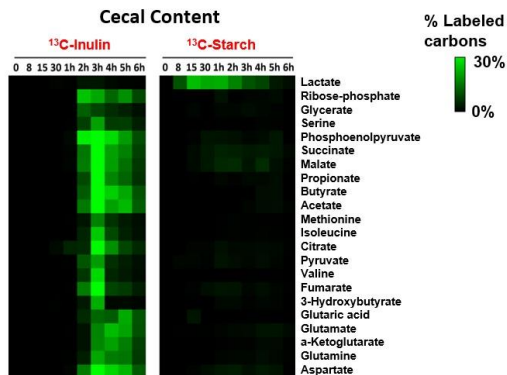

### F

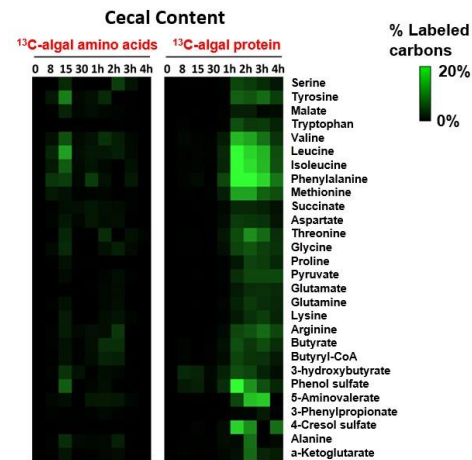

877

878

879

Figure 1. Microbiome consumes dietary fiber and protein (legend on next page)

880 **Figure 1. Microbiome consumes dietary fiber and protein.**

- 881 (A) Composition of the measured portal microbial metabolome. The pie charts show the relative  
882 molar abundance of different gut microbiota-associated metabolites in mice (N = 6 mice).
- 883 (B) Experimental scheme. Mice received an oral gavage of 4:2:1 starch: protein (or free amino acids):  
884 inulin by weight. In each dietary condition, one component was <sup>13</sup>C-labeled. After gavage of the  
885 labeled diet, tissue and serum metabolite labeling were measured over time by LC-MS.
- 886 (C) Dietary starch feeds the host, while dietary inulin feeds the microbiome. The data shows  
887 concentrations of labeled carbons in hexose and acetate in portal circulation (mean ± s.e., N = 3  
888 mice).
- 889 (D) Inulin is a major microbiome feedstock. Heatmap shows the percentage of labeled carbon atoms  
890 in the indicated metabolites in cecal content. Each data point is median of N = 3 mice.
- 891 (E) Dietary amino acids feed the host while dietary algal protein feeds the microbiome. The data  
892 shows concentrations of labeled carbons in valine and acetate in portal circulation (mean ± s.e., N  
893 = 3 mice).
- 894 (F) Protein but not free amino acids are a major microbiome feedstock. Heatmap shows the  
895 percentage of labeled carbon atoms in the indicated metabolites in cecal content. Each data point  
896 is median of N = 3 mice.
- 897
- 898

| Metabolite                | Systemic Concentration(μM) | Portal/Systemic (Log 2) | Abx/Conv (Log 2) | Source | Dietary Fiber | Dietary Protein | Circulating lactate | Source     |
|---------------------------|----------------------------|-------------------------|------------------|--------|---------------|-----------------|---------------------|------------|
| Acetate                   | 210.0                      | 3.1                     | -1.9             |        | 41%           | 8%              | 7%                  | Fiber      |
| Phenol                    | 23.0                       | 0.1                     | -4.3             |        | 0%            | 41%             | 0%                  | Protein    |
| Indoxyl sulfate           | 22.0                       | -0.2                    | <-5.0            |        | 0%            | 68%             | 0%                  | Protein    |
| Serotonin                 | 12.0                       | -0.5                    | -1.4             |        | 0%            | 15%             | 0%                  | Protein    |
| Propionate                | 9.9                        | >5.0                    | <-5.0            |        | 28%           | 4%              | 6%                  | Fiber      |
| 4-Methylvaleric acid      | 7.3                        | 0.5                     | -0.1             |        | 6%            | 43%             | 2%                  | Fiber      |
| Indole-3-acetic acid      | 7.2                        | -0.3                    | -0.9             |        | 0%            | 66%             | 0%                  | Protein    |
| Phenyl sulfate            | 6.6                        | -0.5                    | <-5.0            |        | 0%            | 42%             | 0%                  | Protein    |
| Acetylglycine             | 5.4                        | 0.2                     | -0.2             |        | 29%           | 22%             | 0%                  | Fiber      |
| 4-Ethylphenol             | 5.2                        | 0.2                     | -0.9             |        | 0%            | 23%             | 0%                  | Protein    |
| Indole-3-propionate       | 4.6                        | 0.0                     | <-5.0            |        | 0%            | 39%             | 0%                  | Protein    |
| Hippuric acid             | 4.2                        | 0.3                     | -4.4             |        | 0%            | 33%             | 0%                  | Protein    |
| 4-Cresol                  | 4.2                        | 0.6                     | -0.4             |        | 0%            | 26%             | 0%                  | Protein    |
| Indole-3-acetylaldehyde   | 4.1                        | -0.3                    | -0.2             |        | 0%            | 13%             | 0%                  | Protein    |
| Trimethylamine-N-oxide    | 3.8                        | 0.3                     | -3.8             | Others | 0%            | 0%              | 0%                  | Others     |
| Butyrate                  | 3.6                        | >5.0                    | <-5.0            |        | 54%           | 13%             | 7%                  | Fiber      |
| Isobutyrate               | 2.8                        | 2.8                     | -4.1             |        | 5%            | 35%             | 1%                  | Protein    |
| 2-Methylbutyrate          | 2.8                        | 1.4                     | -3.0             |        | 5%            | 54%             | 1%                  | Protein    |
| Catechol                  | 2.8                        | 0.0                     | <-5.0            | Others | 0%            | 0%              | 0%                  | Others     |
| 5-Aminovaleric acid       | 2.0                        | 0.4                     | -0.3             |        | 0%            | 14%             | 0%                  | Protein    |
| Indole-3-lactic acid      | 1.9                        | 0.8                     | -0.7             |        | 0%            | 27%             | 0%                  | Protein    |
| 3-Hydroxycinnamic acid    | 1.6                        | -0.1                    | -0.6             |        | 0%            | 64%             | 0%                  | Protein    |
| 3-Phenylpropionate        | 1.5                        | 2.4                     | -5.0             |        | 0%            | 22%             | 0%                  | Protein    |
| Isovaleric acid           | 1.2                        | 2.9                     | -3.7             |        | 1%            | 45%             | 1%                  | Protein    |
| Benzoic acid              | 1.2                        | 0.3                     | <-5.0            |        | 0%            | 32%             | 0%                  | Protein    |
| Valerate                  | 1.1                        | 4.9                     | -3.8             |        | 6%            | 37%             | 5%                  | Protein    |
| Cinnamoylglycine          | 1.1                        | 0.7                     | -1.1             |        | 0%            | 39%             | 0%                  | Protein    |
| Inosine                   | 1.1                        | -3.3                    | 0.4              |        | 12%           | 11%             | 0%                  | Fiber      |
| Phenylacetic acid         | 0.79                       | 0.6                     | -2.8             |        | 0%            | 50%             | 0%                  | Protein    |
| 4-Hydroxyphenylpropionate | 0.76                       | 0.2                     | -2.0             |        | 0%            | 72%             | 0%                  | Protein    |
| Propionylglycine          | 0.75                       | 1.2                     | -0.1             |        | 21%           | 24%             | 0%                  | Fiber      |
| Phenylpropionylglycine    | 0.75                       | 0.6                     | -0.3             |        | 2%            | 22%             | 0%                  | Protein    |
| Heptanoic acid            | 0.74                       | 0.6                     | -0.3             |        | 6%            | 11%             | 0%                  | Protein    |
| Indole                    | 0.53                       | 0.2                     | -2.6             |        | 0%            | 69%             | 0%                  | Protein    |
| Butyrylglycine            | 0.39                       | 1.1                     | -1.4             |        | 37%           | 28%             | 0%                  | Fiber      |
| 4-Hydroxyphenylacetate    | 0.37                       | 0.7                     | -1.0             |        | 0%            | 32%             | 0%                  | Protein    |
| N-Acetyl-Tryptophan       | 0.37                       | 0.1                     | 0.5              |        | 0%            | 13%             | 0%                  | Protein    |
| Tauroursodeoxycholic acid | 0.33                       | 2.9                     | -2.2             |        | 0%            | 0%              | 0%                  | Bile acids |
| 4-Hydroxybenzoic acid     | 0.25                       | 0.7                     | -1.0             |        | 0%            | 9%              | 0%                  | Protein    |
| Cinnamic acid             | 0.20                       | 2.5                     | -2.6             |        | 0%            | 61%             | 0%                  | Protein    |
| Taurodeoxycholic acid     | 0.11                       | 4.8                     | -3.1             |        | 0%            | 0%              | 0%                  | Protein    |
| 2-Hydroxyhippuric acid    | 0.062                      | 1.5                     | -0.7             |        | 0%            | 22%             | 0%                  | Protein    |
| Imidazole propionate      | 0.051                      | 0.7                     | -0.7             |        | 0%            | 53%             | 0%                  | Protein    |
| Deoxycholic acid          | 0.048                      | 3.1                     | <-5.0            |        | 0%            | 0%              | 0%                  | Bile acids |
| Indole-3-ethanol          | 0.032                      | 1.6                     | -0.3             |        | 0%            | 81%             | 0%                  | Protein    |
| Ursodeoxycholic acid      | 0.026                      | 2.5                     | <-5.0            |        | 0%            | 0%              | 0%                  | Bile acids |
| 4-Cresol sulfate          | 0.026                      | -0.2                    | -2.8             |        | 0%            | 26%             | 0%                  | Protein    |
| Phenylacetylglucine       | 0.017                      | 0.2                     | -0.3             |        | 0%            | 32%             | 0%                  | Protein    |
| Equol                     | 0.013                      | 3.7                     | <-5.0            | Others | 0%            | 0%              | 0%                  | Others     |
| Hyodeoxycholic acid       | 0.009                      | 3.0                     | -3.7             |        | 0%            | 0%              | 0%                  | Bile acids |
| Lithocholic acid          | 0.008                      | 1.8                     | <-5.0            |        | 0%            | 0%              | 0%                  | Bile acids |
| Taroulithocholic acid     | <0.001                     | >5.0                    | <-5.0            |        | 0%            | 0%              | 0%                  | Bile acids |
| Isoallothocholic acid     | <0.001                     | >5.0                    | <-5.0            |        | 0%            | 0%              | 0%                  | Bile acids |
| Glycoursodeoxycholic acid | <0.001                     | >5.0                    | -4.5             |        | 0%            | 0%              | 0%                  | Bile acids |
| Glycodeoxycholic acid     | <0.001                     | >5.0                    | -1.3             |        | 0%            | 0%              | 0%                  | Bile acids |

899 **Table 1. Absolute concentrations and sources of microbiota-associated metabolites.**

900 Data are from ad lib fed state (ZT0); for ad lib fasted state (ZT12), see Supplementary Table S1. Absolute  
901 concentration is mean, N = 5 mice. Portal/systemic = fold-change in concentration between the portal vein  
902 and tail vein (median, N = 5 mice). Abx/Conv refers to fold-change in portal blood concentration between  
903 mice treated with antibiotics cocktail versus not (median, N = 5 mice/group). Source bar indicates the  
904 relative contribution to the indicated metabolite from dietary inulin, algal protein and circulating lactate  
905 (based on isotope tracing). Percentages indicate quantitative relative contributions from those nutrients  
906 (median, N = 4). Numbers typically add up to less than 100%, as other sources (e.g. mucins) contribute.

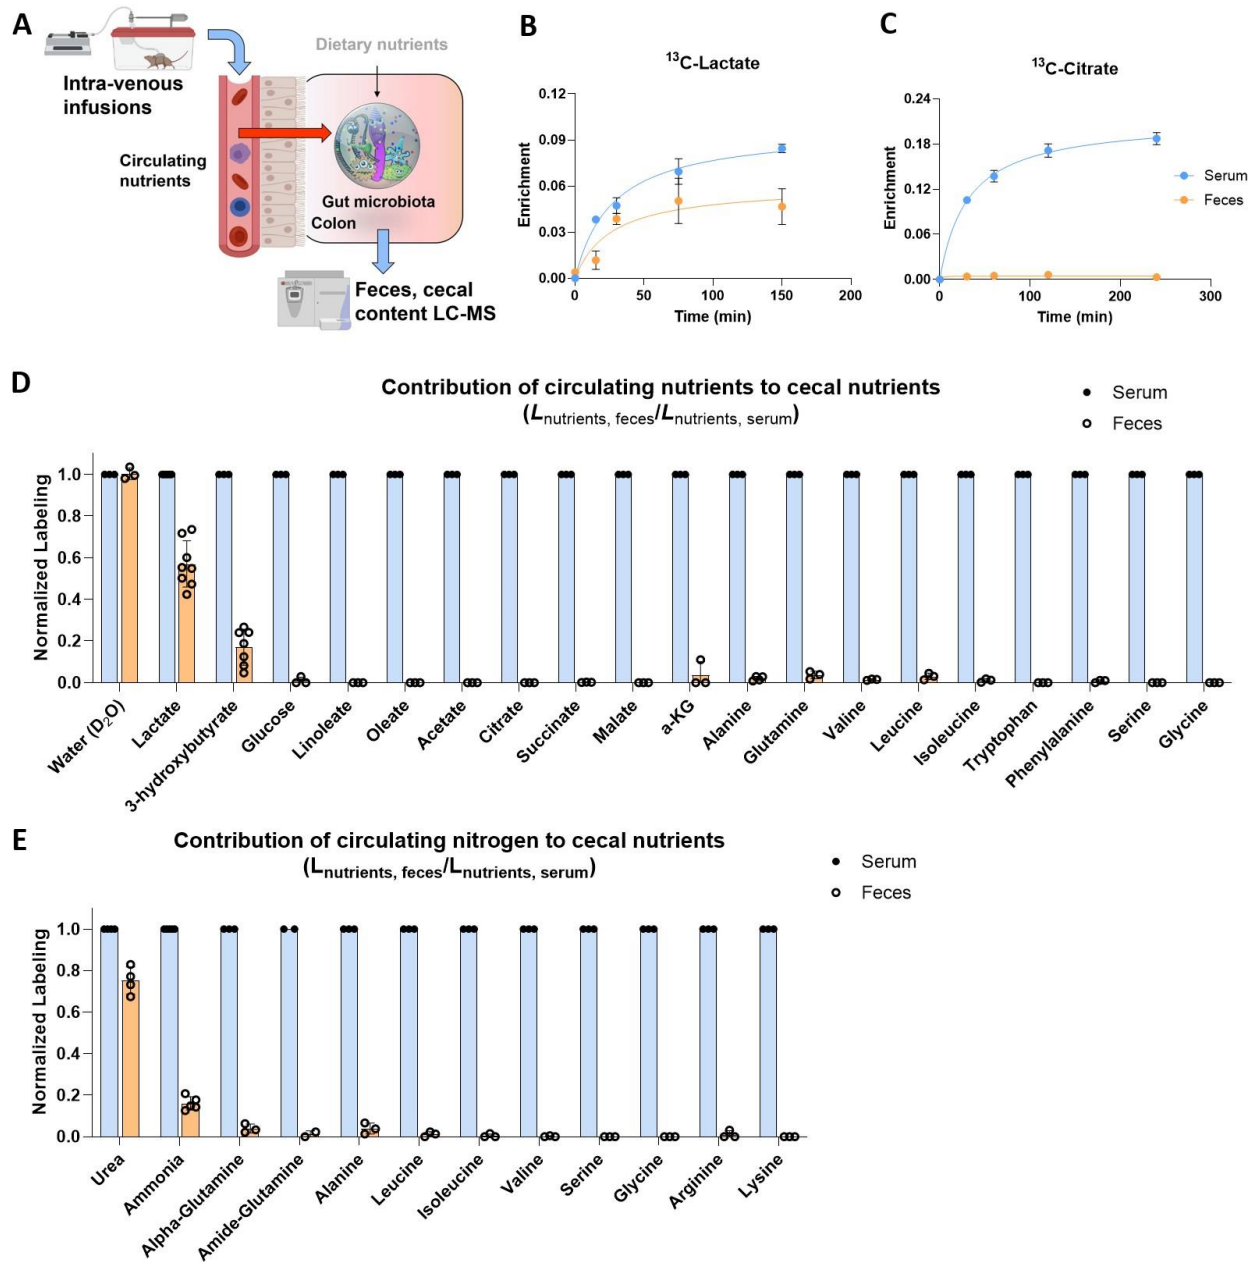

907

908 **Figure 2. Circulating lactate and 3-hydroxybutyrate feed the gut microbiome.**

909 (A) Schematic of intravenous infusion of isotope-labeled nutrients to identify circulating metabolites  
910 that feed gut microbiome.

911 (B) Circulating lactate rapidly enters the feces. Mice were infused with  $^{13}\text{C}$ -lactate and serum and fresh  
912 feces enrichment were compared. Mean $\pm$ s.e. N = 3.

913 (C) Circulating citrate does not enter the feces. As in (B), for  $^{13}\text{C}$ -citrate.

914 (D) Passage of circulating  $^{13}\text{C}$ -labeled nutrients into the feces. Mice were infused with labeled nutrients  
915 for 2.5 h, and labeling fraction in feces was normalized to labeling fraction in serum. Mean $\pm$ s.e.  
916 N = 3 except for lactate (N = 8) and 3-hydroxybutyrate (N = 7).

917 (E) Passage of circulating  $^{15}\text{N}$ -labeled nutrients into the feces. As in (D), for  $^{15}\text{N}$ -labeling. Mean $\pm$ s.e.  
918 N = 3 except for urea (N = 4) and ammonia (N = 5).

919

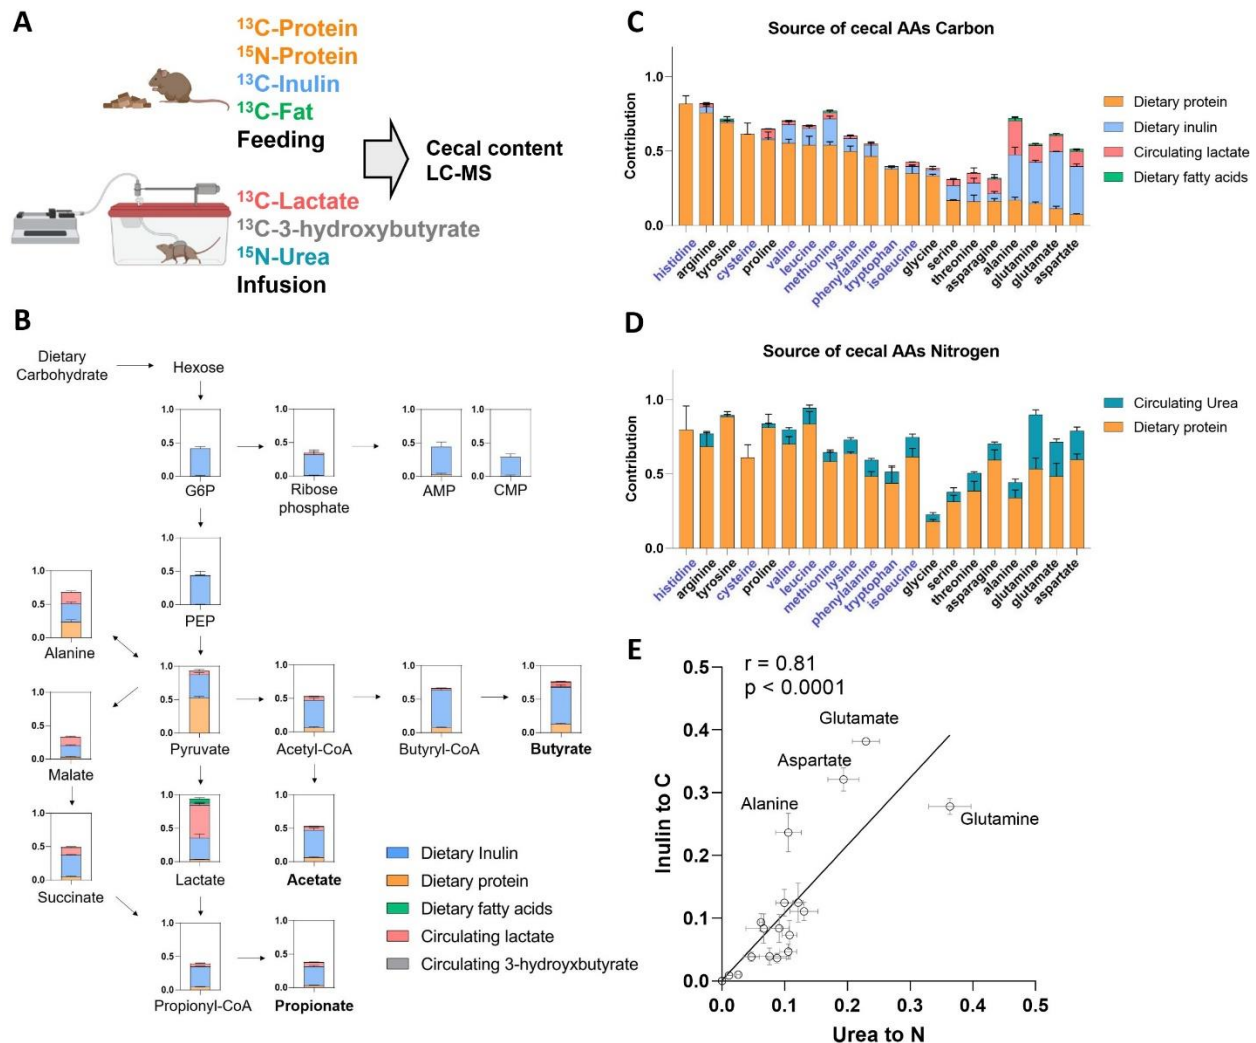

920

921

922 **Figure 3. Quantitative analysis of dietary and circulating nutrient contributions to gut microbiome.**

923 (A) Experimental design. Mice were fed chow containing  $^{13}\text{C}$ -protein,  $^{13}\text{C}$ -inulin,  $^{13}\text{C}$ -fatty acids, or  $^{15}\text{N}$ -  
 924 protein for 24 h. Alternatively, mice were intravenously infused with  $^{13}\text{C}$ -lactate,  $^{13}\text{C}$ -3-hydroxybutyrate or  
 925  $^{15}\text{N}$ -urea for 24 h. The labeling of cecal content metabolites was analyzed by LC-MS.

926 (B) Contribution of dietary and circulating nutrients to carbohydrate fermentation pathways in gut  
 927 microbiome. Mean  $\pm$  s.e. N = 4.

928 (C) Contribution of dietary and circulating nutrients to cecal amino acid carbon. The names of essential  
 929 amino acids (EAA) are written in blue and non-essential amino acids (NEAA) in black. Mean  $\pm$  s.e. N = 4.

930 (D) Contribution of dietary and circulating nutrients to cecal amino acid nitrogen. As in (C), for nitrogen.

931 (E) Positive correlation, across amino acids in the cecal contents, of carbon contribution from dietary inulin  
 932 and nitrogen contribution from circulating urea. Mean  $\pm$  s.e. N = 4.

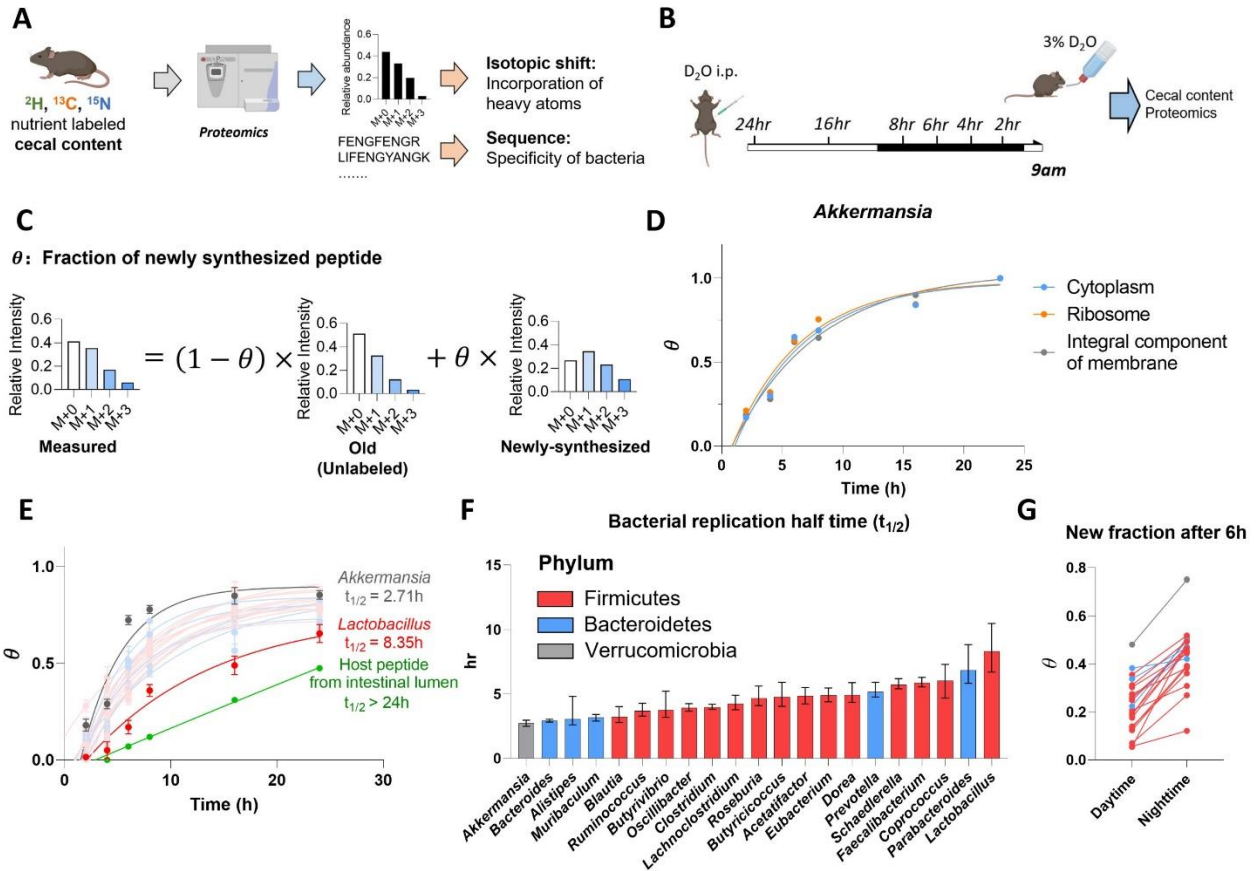

933

934 **Figure 4. Growth rate of different gut bacterial genera quantified by isotope tracing.**

935 (A) Experimental approach for isotope tracing into specific gut bacteria. Only peptides that are specific to  
 936 a particular bacterial genus were examined.

937 (B) Growth rate quantification using D<sub>2</sub>O. Mice received D<sub>2</sub>O by i.p. injection followed by D<sub>2</sub>O drinking  
 938 water and cecal content labeling was measured over time by proteomics and metabolomics.

939 (C) Calculation of newly synthesized peptide fraction ( $\theta$ ). The experimentally observed peptide mass  
 940 isotope distribution was fit to a linear combination of unlabeled peptide (“old,” heavy forms from natural  
 941 isotope abundance) and newly synthesized peptide (“new,” heavy forms from isotope labeling pattern of  
 942 free cecal amino acids and from natural isotope abundance).

943 (D) Different cellular compartments from the same bacterial genus show similar labeling rate.

944 (E) Genus-specific growth rates were determined by a single exponential fitting, as a function of time, of  $\theta$   
 945 (mean across both different peptides measured from that genus and replicate mice). Mean $\pm$ s.e. N=5 mice  
 946 for each time point.

947 (F) Bacterial replication half time of different gut bacteria. Data are exponential fits  $\pm$ s.e.

948 (G) The gut bacteria synthesize protein in sync with the physiological feeding patterns of the host. The  
 949 figure shows the average newly synthesized peptide fraction ( $\theta$ ) for different gut bacterial genera after  
 950 D<sub>2</sub>O labeling during daytime vs nighttime. Each line connects the daytime and nighttime measurements  
 951 for one genus. Mean, N = 5 mice for daytime and for nighttime.

952

953

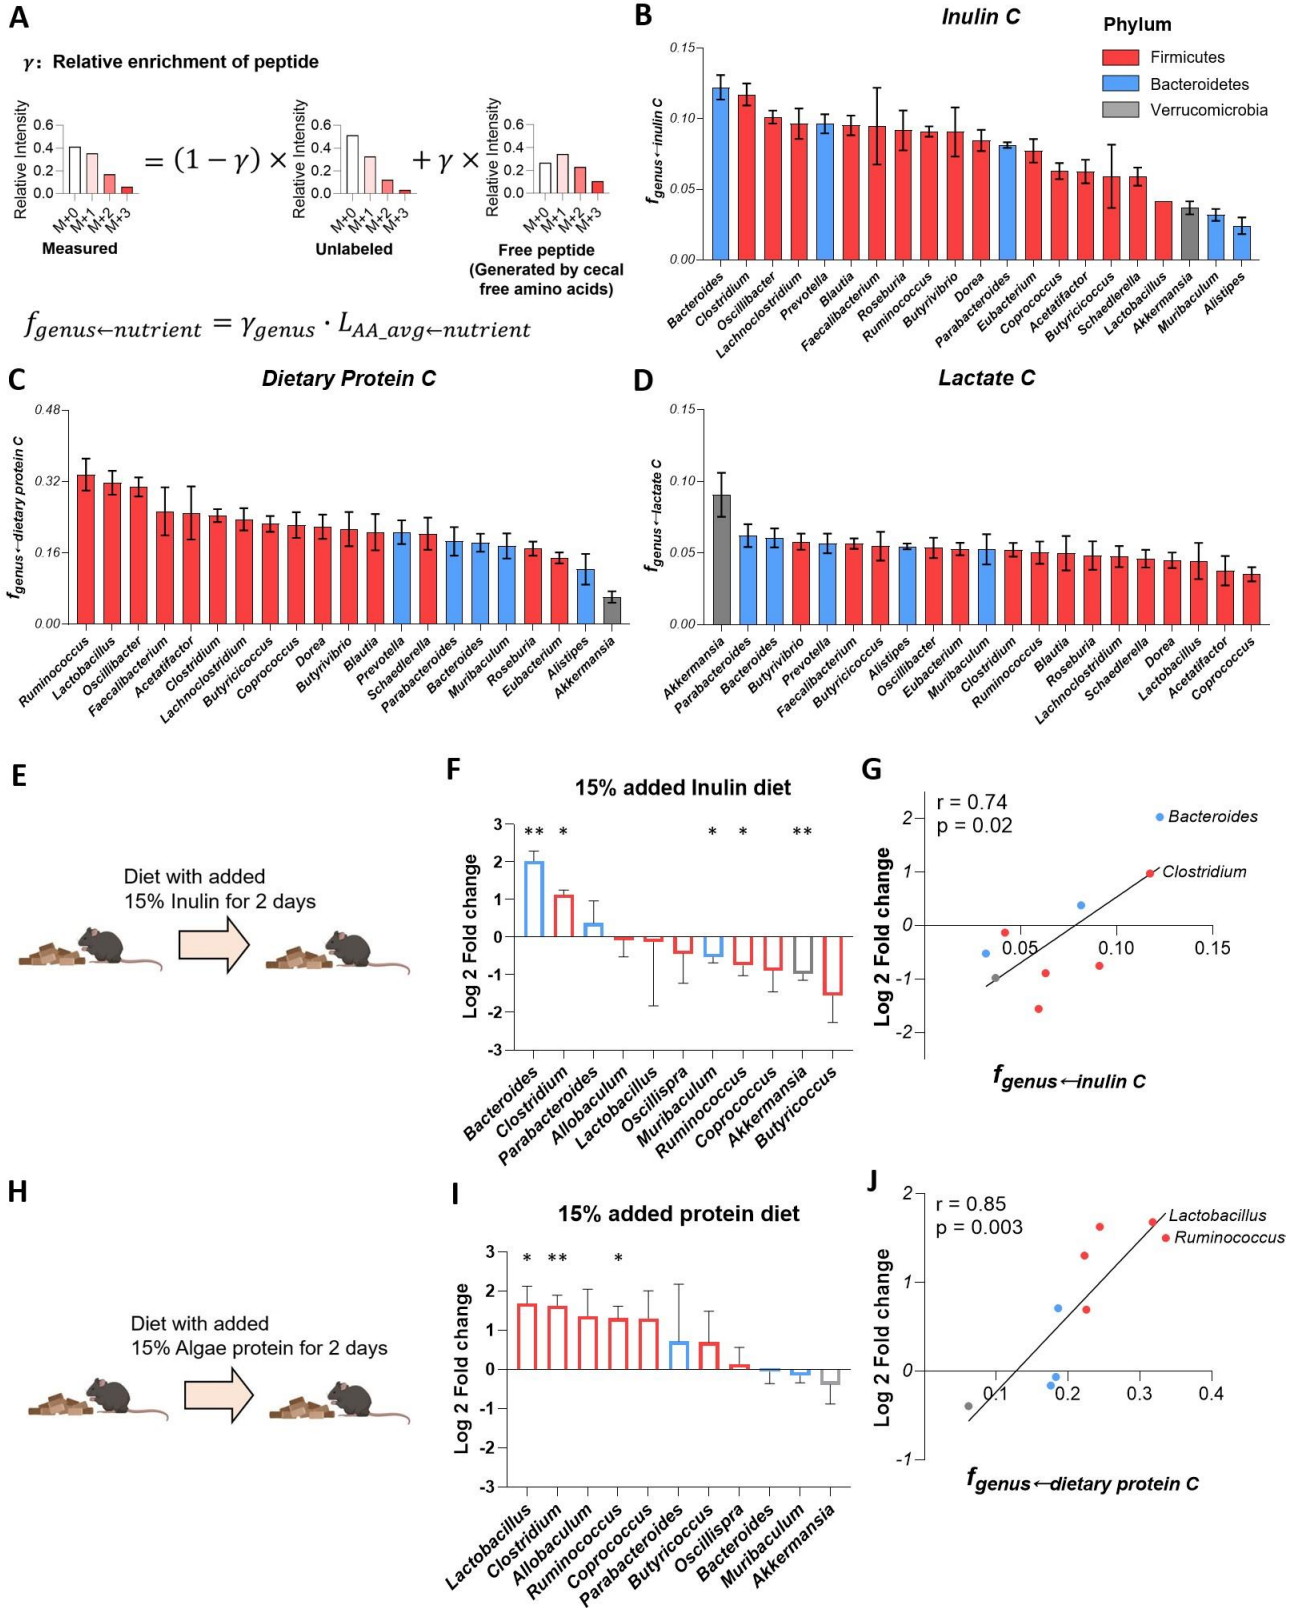

954

955 **Figure 5. Preferred carbon sources differ across gut bacteria (legend on next page).**



956 **Figure 5. Preferred carbon sources differ across gut bacteria**

957 (A) Calculation of peptide relative  $^{13}\text{C}$ -enrichment ( $\gamma$ ) and carbon contribution from the tracer to a bacterial  
958 genus ( $f_{\text{genus} \leftarrow \text{nutrient}}$ ). First, the experimentally observed peptide mass isotope distribution was fit to a linear  
959 combination of unlabeled peptide (heavy forms from natural isotope abundance) and a peptide made from  
960 free cecal amino acids (heavy forms from isotope labeling pattern of free cecal amino acids and from natural  
961 isotope abundance), yielding  $\gamma$ . Then,  $f_{\text{genus} \leftarrow \text{nutrient}}$  was determined by correcting for the fractional  
962 contribution of that tracer to the cecal free amino acid pools.

963 (B) Carbon contribution of dietary inulin across bacterial genera. Mean $\pm$ s.e. N=4 mice.

964 (C) Carbon contribution of dietary algal protein across bacterial genera. Mean $\pm$ s.e. N=6 mice.

965 (D) Carbon contribution of circulating lactate across bacterial genera. Mean $\pm$ s.e. N=7 mice.

966 (E) Experimental scheme of high-inulin diet feeding followed by 16S ribosomal RNA sequencing.

967 (F) Genus-level microbiota composition changes after high-inulin diet. The genera increased after high-  
968 inulin diet prefer inulin in (B). Mean $\pm$ s.e. N=3 mice. \*P<0.05 and \*\*P<0.01 by two-sided Student's t-test.

969 (G) Correlation between genera abundance changes and carbon-source preference.

970 (H- J) As in (E - G), for algal protein-supplemented diet.

971

972

973

974

975

976

977

978

979

980

981

982

983

984

985

986

987

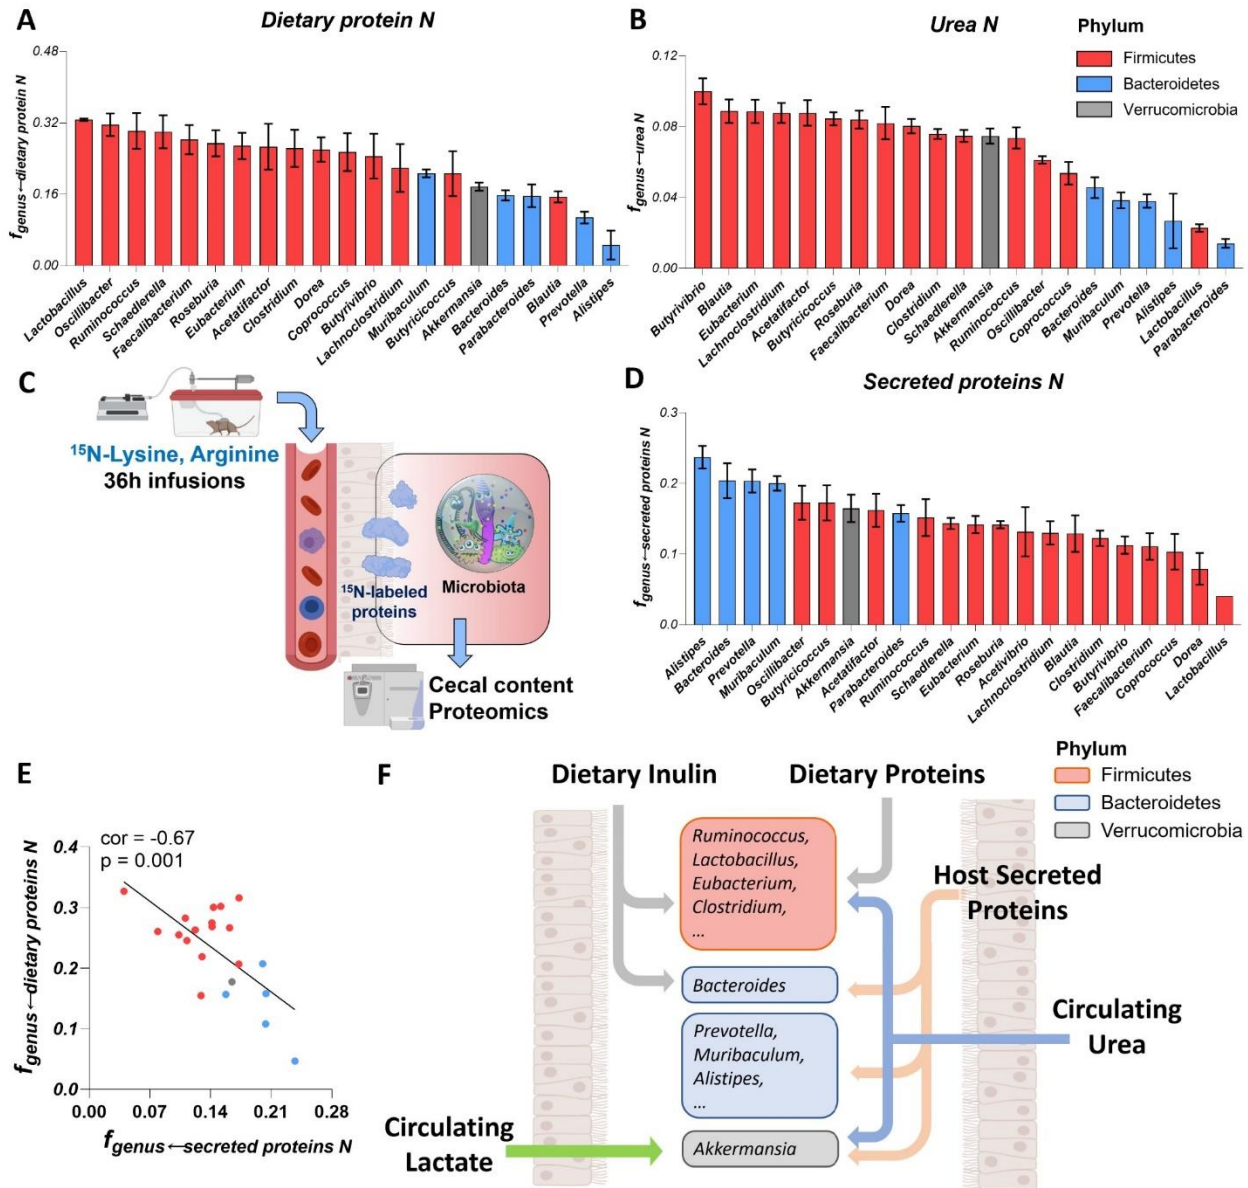

988 **Figure 6. Firmicutes favor dietary protein while Bacteroidetes prefer secreted host protein**

989 (A) Nitrogen contribution of dietary algal protein across bacterial genera. Mean±s.e. N=6 mice.

990 (B) Nitrogen contribution of circulating urea across bacterial genera. Mean±s.e. N=6 mice.

991 (C) Experimental schematic of long-term <sup>15</sup>N-lysine and <sup>15</sup>N-arginine infusion to probe the contribution of  
 992 secreted host proteins to different bacterial genera.

993 (D) Nitrogen contribution of secreted host proteins across bacterial genera. Mean±s.e. N=5 mice.

994 (E) Negative correlation between  $f_{genus \leftarrow secreted\ proteins\ N}$  and  $f_{genus \leftarrow dietary\ proteins\ N}$ .

995 (F) Summary of carbon and nitrogen inputs to different gut bacteria. Firmicutes prefer dietary carbon  
 996 sources (fiber and protein) and nitrogen from host circulating urea. Bacteroidetes heavily use dietary fiber,  
 997 while using on host secreted proteins for nitrogen. Verrucomicrobia prefers host secreted nutrients, both  
 998 protein and circulating small molecules (lactate, urea).

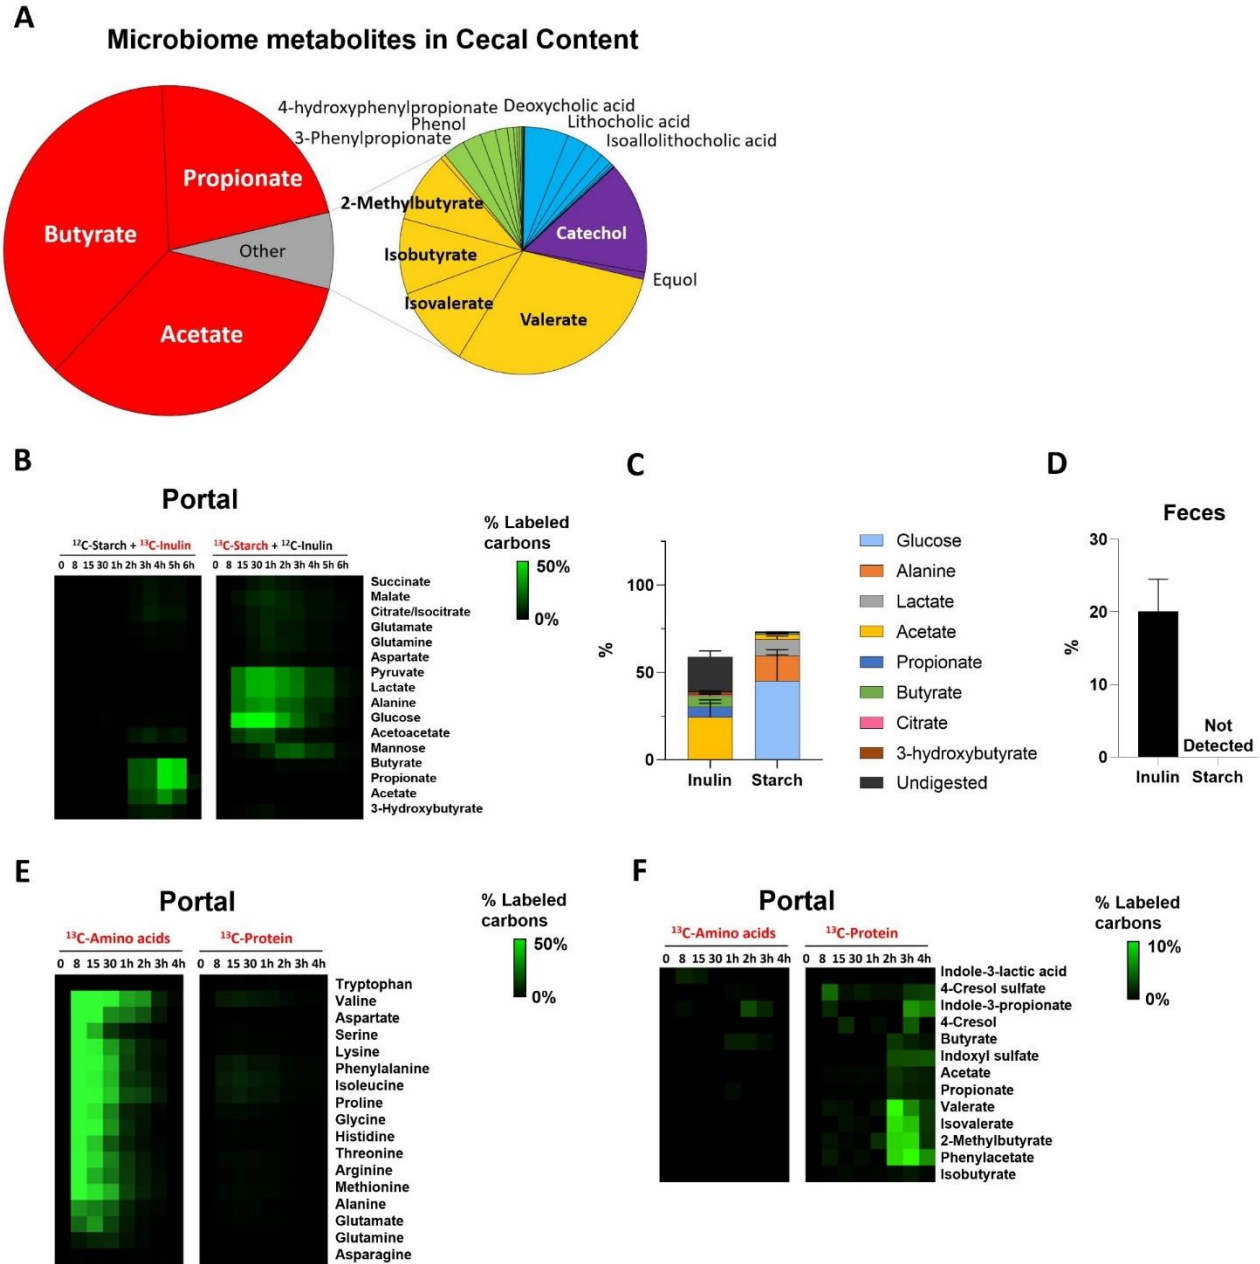

999

1000 **Figure S1. Microbiome consumes dietary fiber and protein.**

1001 (A) Composition of the measured cecal microbial metabolome. The pie charts show the molar  
1002 abundance of different gut microbiota-associated metabolites (N = 6 mice).

1003 (B) Heatmap showing the percentage of labeled carbon atoms in the indicated metabolites in portal  
1004 circulation, following gavage of 4:2:1 starch: protein (or free amino acids): inulin, with the  
1005 indicated nutrient labeled. Each data point is median of N = 3 mice.

1006 (C) Metabolic fate of inulin and starch. Stacked bars show the fraction of gavaged inulin and starch  
1007 that is converted into each of the indicated metabolic products, with the undigested fraction being  
1008 excreted in the feces (mean  $\pm$  s.e., N = 3 mice).

1009 (D) Undigested carbohydrate in the feces. Graph shows the fraction of labeled hexose after cecal  
1010 content hydrolysis, 12 h following gavage as above (mean  $\pm$  s.e., N = 3 mice).

1011 (E) Heatmap showing the percentage of labeled carbon atoms in the indicated amino acids in portal  
1012 circulation, following gavage of 4:2:1 starch: protein (or free amino acids): inulin, with the  
1013 indicated nutrient labeled. Each data point is median of N = 3 mice.

1014 (F) As in (E), for microbiota-associated metabolites.

1015

1016

1017

1018

1019

1020

1021

1022

1023

1024

1025

1026

1027

1028

1029

1030

1031

1032

1033

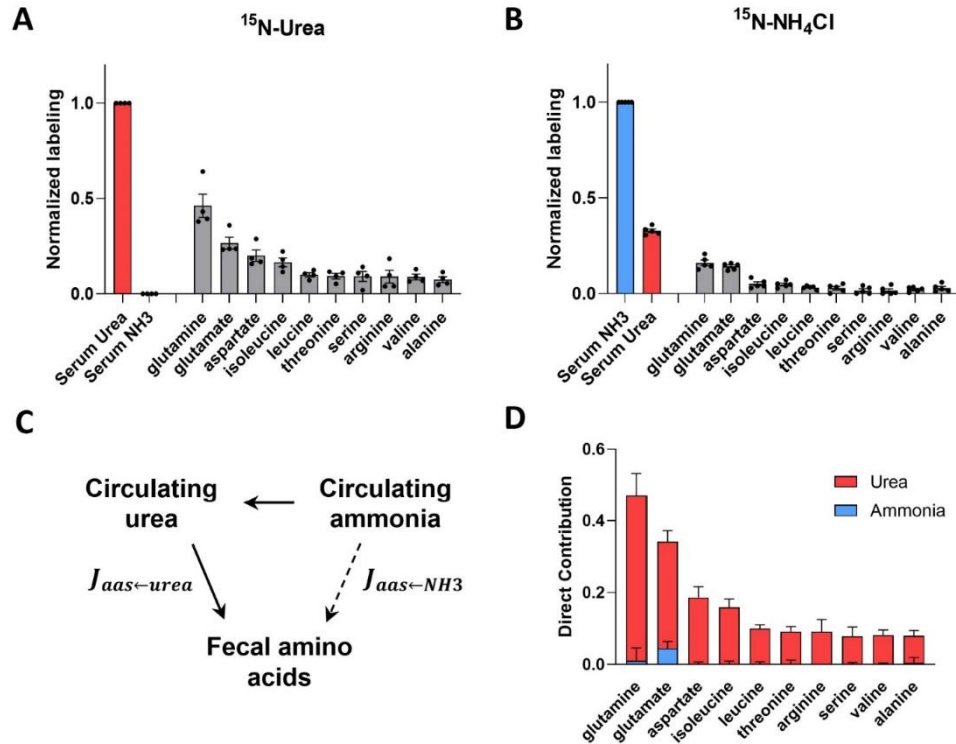

1034

1035

1036 **Figure S2. Circulating ammonia contributes to microbiota metabolism via circulating urea.**

1037 (A) Normalized labeling of serum urea, ammonia and cecal amino acids after <sup>15</sup>N-urea infusion (mean±  
1038 s.e., N = 4 mice). Feces labeling fraction is normalized to serum infused tracer (urea) labeling fraction.

1039 (B) As in (A), for <sup>15</sup>N-ammonia infusion (mean± s.e., N = 5 mice),

1040 (C) Model of direct contribution calculation from circulating urea and ammonia to fecal amino acids.

1041 (D) Direct contributions of circulating urea and ammonia to cecal amino acids (mean± s.e., N = 4  
1042 mice).

1043

1044

1045

1046

1047

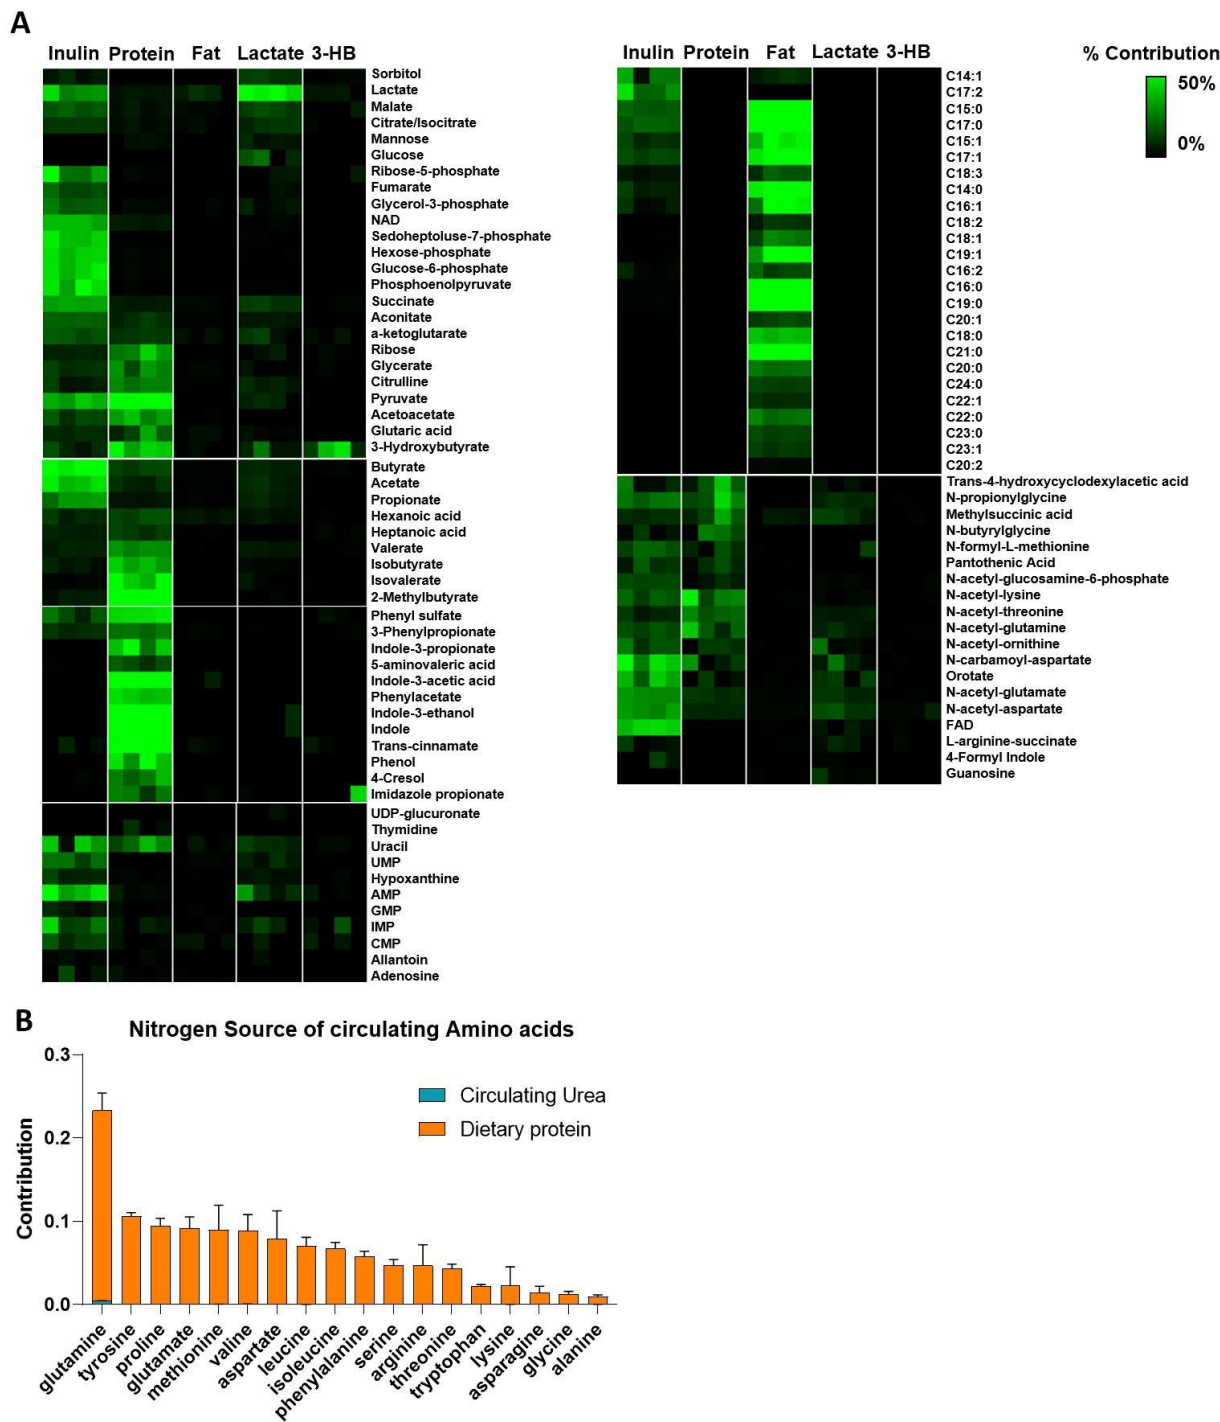

1048

1049 **Figure S3. Quantitative analysis of dietary and circulating nutrient contributions to gut**  
 1050 **microbiome metabolism.**

1051 (A) Heat maps showing the contribution of dietary or circulating nutrients to cecal metabolites. For  
 1052 experimental design, see Figure 3. N = 4 mice.

1053 (B) Amino acids synthesized in the gut microbiome, stay in the microbiome, as urea contributes to  
 1054 microbiome amino acids but not host circulating amino acids. Mean  $\pm$  s.e. N = 4 mice.

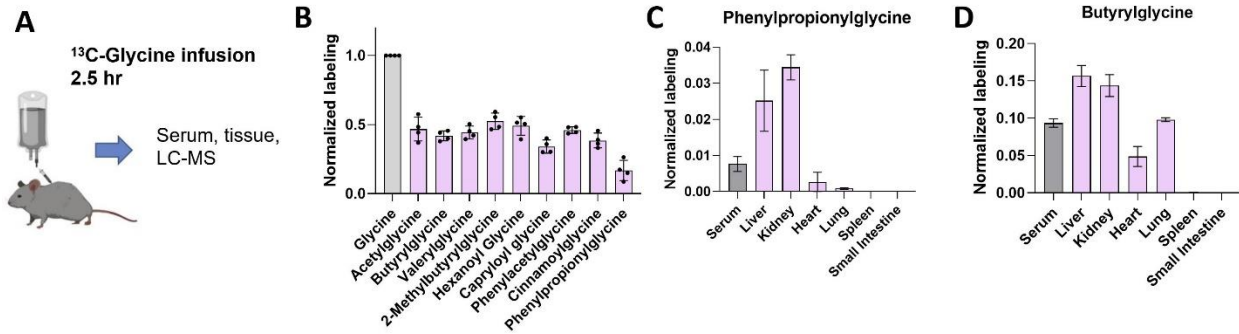

1055

1056

1057 **Figure S4. Liver and kidney use circulating glycine to synthesize acyl-glycines.**

1058 (A) Experimental design. Mice were intravenously infused with [U- $^{13}\text{C}$ ]glycine for 2.5 h and tissue  
1059 and serum glycine and acyl-glycine labeling were measured.

1060 (B) Circulating acyl-glycines are made from circulating glycine. Mean  $\pm$  s.e. N = 4 mice.

1061 (C) Tissue phenylpropionylglycine labeling (normalized to circulating glycine labeling). Mean  $\pm$  s.e.  
1062 N = 4 mice.

1063 (D) Tissue butyrylglycine labeling (normalized to circulating glycine labeling). Mean  $\pm$  s.e. N = 4  
1064 mice.

1065

1066

1067

1068

1069

1070

1071

1072

1073

1074

1075

1076

1077

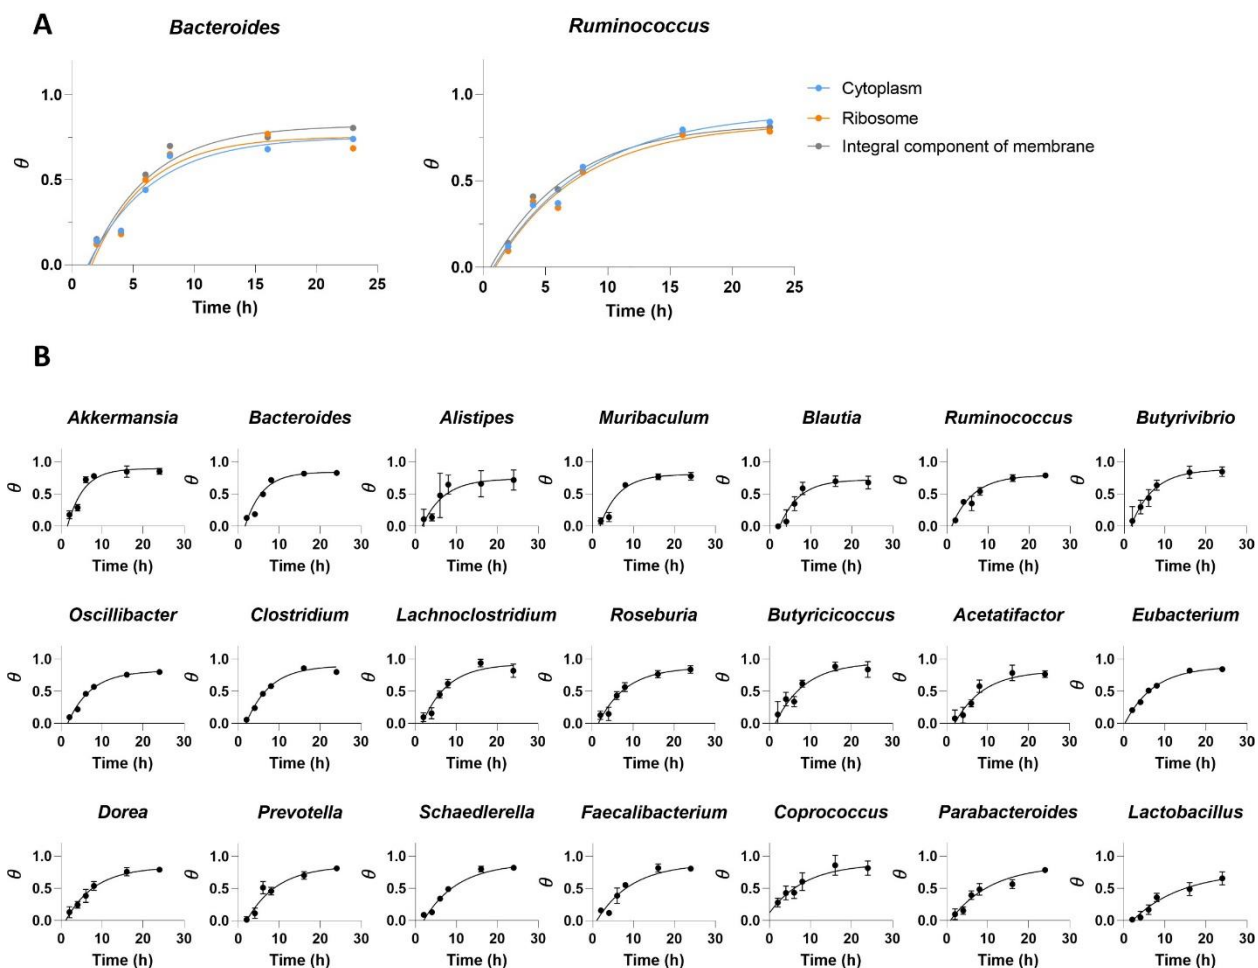

1078

1079 **Figure S5. Single exponential fit of newly synthesized fraction of microbial peptides over time.**

1080 (A) Different cellular compartments from the same bacterial genus show similar labeling rate.

1081 (B) Single exponential fit was applied to determine genus-level microbial turnover. Data are mean  $\pm$  s.e.

1082 N = 5 mice.

1083

1084

1085

1086

1087

1088

1089

1090



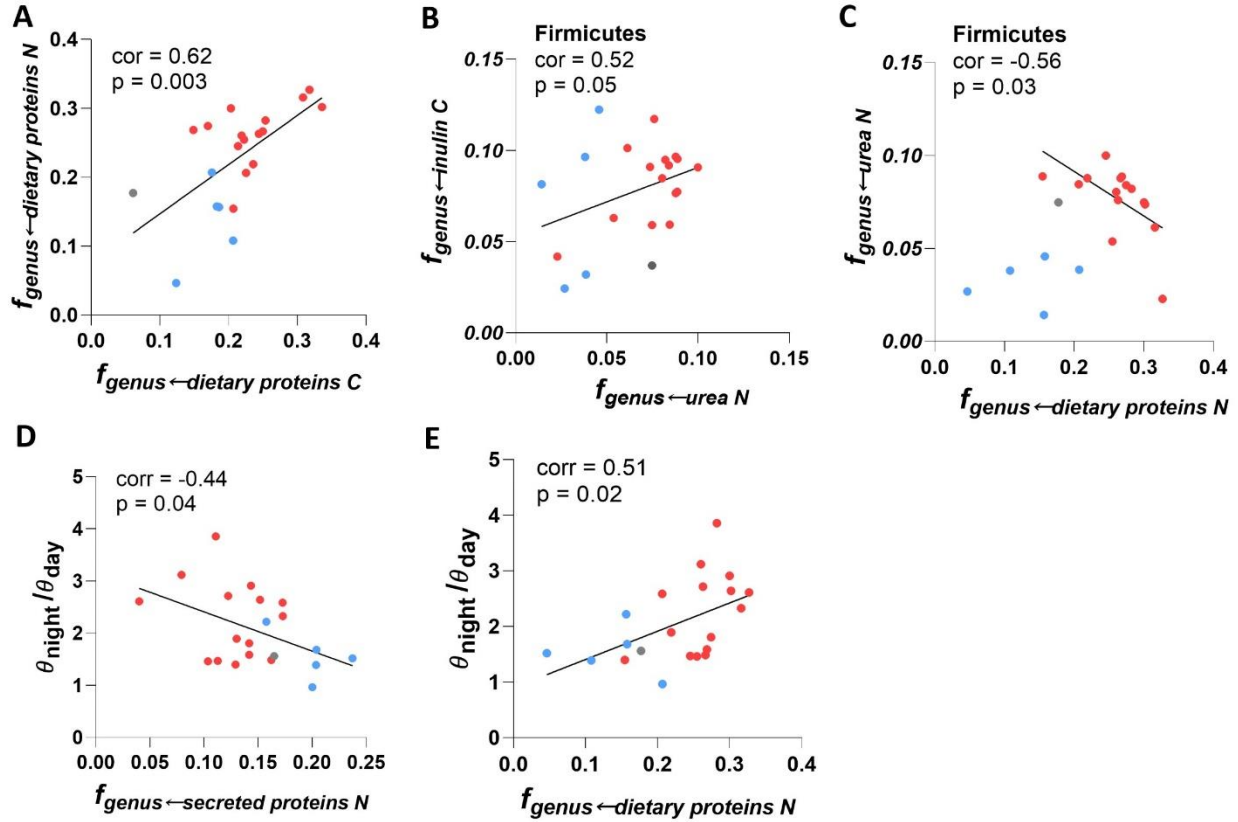

1091 **Figure S6. Correlation analysis of nutrient preferences across different gut bacterial genera.**

1092 (A) Positive correlation between  $f_{\text{genus} \leftarrow \text{dietary proteins C}}$  and  $f_{\text{genus} \leftarrow \text{dietary proteins N}}$ .

1093 (B) Positive correlation between  $f_{\text{genus} \leftarrow \text{inulin C}}$  and  $f_{\text{genus} \leftarrow \text{urea N}}$  in Firmicutes.

1094 (C) Negative correlation between  $f_{\text{genus} \leftarrow \text{urea N}}$  and  $f_{\text{genus} \leftarrow \text{dietary proteins N}}$  in Firmicutes.

1095 (D) Negative correlation between  $\theta_{\text{night}}/\theta_{\text{day}}$  and  $f_{\text{genus} \leftarrow \text{secreted proteins N}}$ .

1096 (E) Positive correlation between  $\theta_{\text{night}}/\theta_{\text{day}}$  and  $f_{\text{genus} \leftarrow \text{dietary proteins N}}$ .

1097

1098

1099

1100

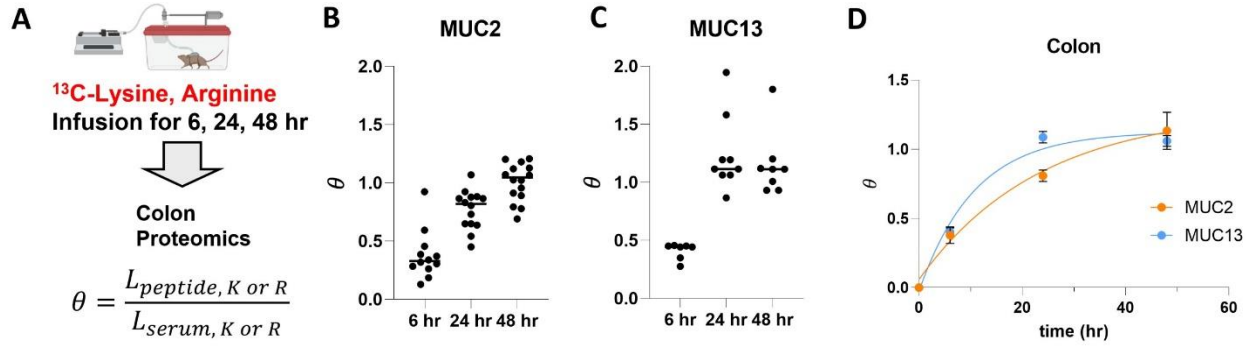

1101

1102

1103 **Figure S7. Host secreted proteins are synthesized from host circulating amino acids.**

1104 (A) Experimental design. Mice were infused with <sup>13</sup>C-lysine and <sup>13</sup>C-arginine and mouse colon protein  
1105 was analyzed by proteomics.

1106 (B) MUC2 labeling (multiple different MUC2 peptides). N = 3 mice.

1107 (C) MUC13 labeling (multiple different MUC13 peptides). N = 3 mice.

1108 (D) Single exponential fit of labeling fraction of MUC2 and MUC13 over time. Mean±s.e. N = 3 mice.

1109

1110

1111

1112

1113

1114

1115

1116
